# Supplementary material
Source: PubMed Central journal article supplement (PMC4733660)
Supplement: NIHMS66706-supplement-Supplementary_data.pdf [file NIHMS66706-supplement-Supplementary_data.pdf]

# Inhibition of the histone demethylase JMJD2E by 3-substituted pyridine 2,4-dicarboxylates

Armin Thalhammer<sup>a</sup>, Jasmin Mecinović<sup>b</sup>, Christoph Loenarz<sup>a</sup>, Anthony Tumber<sup>c</sup>, Nathan R. Rose<sup>a</sup>, Tom D. Heightman<sup>c</sup> and Christopher J. Schofield<sup>a</sup>

<sup>a</sup> Department of Chemistry and the Oxford Centre for Integrative Systems Biology, Chemistry Research Laboratory, University of Oxford, 12 Mansfield Road, Oxford, OX1 3TA, United Kingdom. Fax: +44 1865 285002; Tel: +44 1865 275625; E-mail: Christopher.schofield@chem.ox.ac.uk

<sup>b</sup> Department of Chemistry and Chemical Biology, Harvard University, 12 Oxford St, Cambridge, MA, 02138, USA

<sup>c</sup> Structural Genomics Consortium, University of Oxford, Headington OX3 7DQ, United Kingdom.

## Contents

|                                                                                 |    |
|---------------------------------------------------------------------------------|----|
| Formaldehyde dehydrogenase-based coupled demethylation assays.....              | 2  |
| IC <sub>50</sub> determinations against JMJD2E for selected compounds .....     | 3  |
| Homogeneous time-resolved fluorescence (HTRF)-based PHD2 inhibition assays..... | 4  |
| Synthesis .....                                                                 | 6  |
| General.....                                                                    | 6  |
| Detailed synthetic procedures .....                                             | 7  |
| Analytical HPLC analysis for tested compounds.....                              | 24 |
| HPLC chromatograms for compounds 33-50. ....                                    | 25 |
| References for Supporting Information .....                                     | 35 |

## Formaldehyde dehydrogenase-based coupled demethylation assays

IC<sub>50</sub> values for synthesised compounds were determined using a modified version of a reported<sup>1</sup> coupled demethylation assay. Compounds were dissolved in DMSO or DMSO/H<sub>2</sub>O (1:1, v/v) at stock concentrations of 10 mM or 1 mM depending on solubility; assay mixtures had a final DMSO concentration of 1%. The peptide substrate sequence used was a modified fragment of histone H3, ARK(me<sub>3</sub>)STGGK-NH<sub>2</sub> (Peptide Protein Research Ltd., Fareham, UK). FDH was cloned as a 1320 bp fragment in pNIC28-Bsa4, expressed in an *E. coli* Rosetta strain and purified by immobilized metal affinity chromatography to yield an *N*-terminally hexahistidine-tagged protein. Fluorescence measurements were performed in triplicate using black 384-well microplates with a non-binding surface (Corning Inc., Cat. No. 3655). Incubations contained NAD<sup>+</sup> (0.25 mM), ascorbate (1 mM), ferrous ammonium sulfate (10 μM), peptide substrate (25 μM) sequence from Peptide Protein Research, Hampshire, UK), 2OG (50 μM), FDH (50 μM) and JMJD2E (400 nM) in HEPES buffer (50 mM, pH 7.5) supplemented with Tween<sup>®</sup>-20 (0.01%) in a total volume of 80 μL. Reactions were performed without preincubation and at room temperature. Note that IC<sub>50</sub> values are dependent on the concentration of JMJD2E. The fluorescence increase was measured using an OmegaStar Plus fluorescence microplate reader (BMG Labtech) with excitation and emission wavelengths of 355 and 460 nm, respectively. Percent inhibition was calculated based on the endpoint readings 30 minutes after addition of substrate. Positive control reactions for complete inhibition contained no JMJD2E, and negative control reactions (no inhibition) contained JMJD2E in the absence of inhibitors. The percentage inhibition was plotted against the logarithm of the compound concentration using GraphPad Prism 5.0<sup>TM</sup> and fitted with a sigmoidal dose-response model.

## IC<sub>50</sub> determinations against JMJD2E for selected compounds

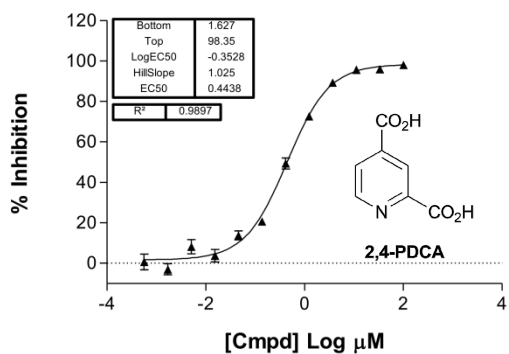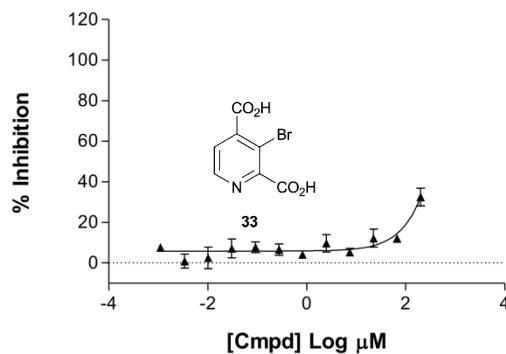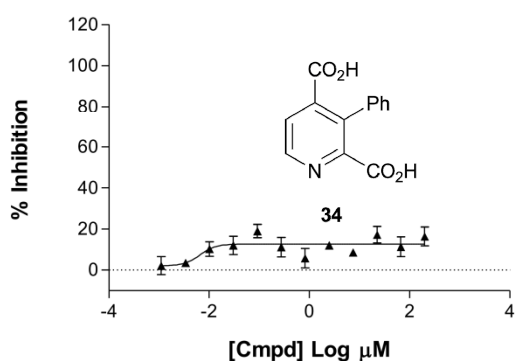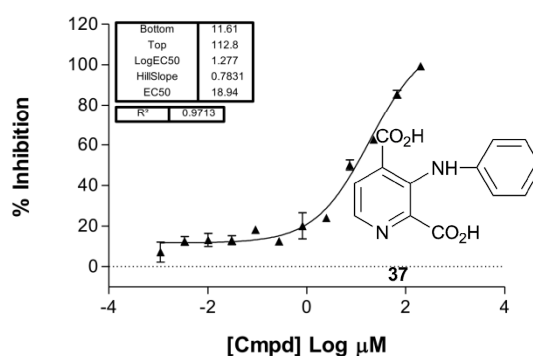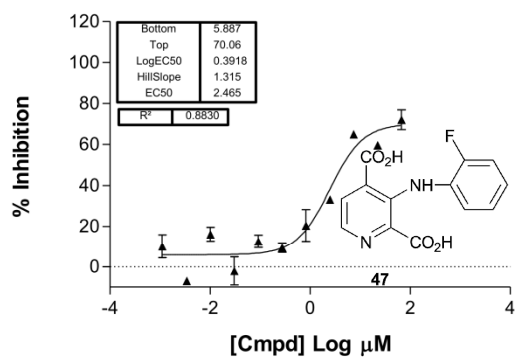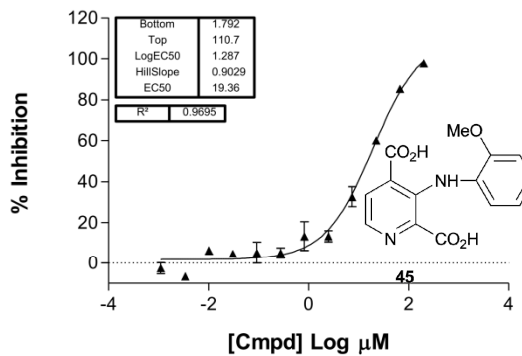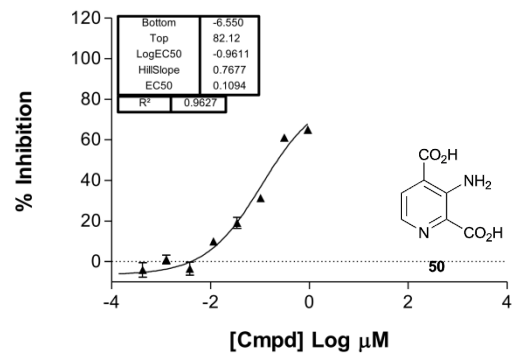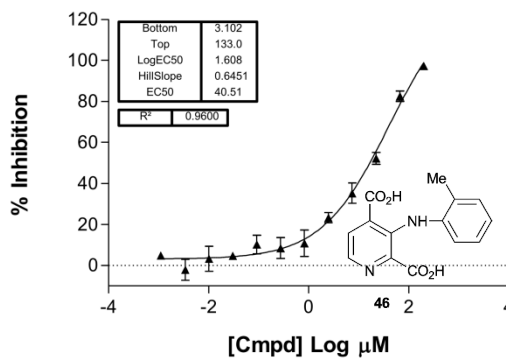

## Homogeneous time-resolved fluorescence (HTRF)-based PHD2 inhibition assays

Compounds were tested for inhibition of the human 2OG oxygenase PHD2 (final concentration 20 nM) with the compounds at a final concentration of 400  $\mu$ M. The assay was carried out essentially as described.<sup>2</sup> Inhibition of PHD2 activity was analyzed by determining the binding of biotinylated HIF-1 $\alpha$ <sub>556-574</sub> (hypoxia-inducible factor 1 $\alpha$ ) peptides to the VCB (von Hippel Lindau protein, Elongin C and B) complex. The ternary VCB complex was produced as described,<sup>3</sup> purified by successive GST (glutathione-S-transferase) and gel filtration chromatography, thrombin cleavage, and further GST and gel filtration chromatography. VCB was labeled with a Eu<sup>3+</sup>-cryptate linker (LANCE Eu-W1024-ITC, PerkinElmer; ~6 Eu per VCB). Inhibition assays were performed in 50  $\mu$ l total volume. For single-point inhibition tests, compounds were tested at 400  $\mu$ M final concentration; reaction mixtures contained 20 nM PHD2, 300 nM HIF-1 $\alpha$ <sub>556-574</sub>, 750 nM 2OG, 100  $\mu$ M Fe(II) and 2 mM ascorbate in HTRF buffer (50 mM Tris pH 7.5, 100 mM NaCl, 0.05% purified BSA, 0.05% Tween-20). Reactions were incubated with shaking at 25 °C for 1 h and quenched by supplementing with 150 mM succinate. Negative controls (corresponding to zero inhibition) contained all components except inhibitors, whereas positive controls (corresponding to full inhibition) contained all components except PHD2.

The quenched reaction (containing 100 nM of biotinylated peptide) was allowed to reach binding equilibrium with streptavidin-allophycocyanin (SA-APC, 75 nM) and Eu<sup>3+</sup>-VCB (0.9 nM) at 20  $\mu$ l total volume in black 384-well clear-bottom microplates by shaking for five minutes before analysis using three repeats per well on an Envision Multilabel plate reader (PerkinElmer) at 25 °C. The readout (HTRF signal) is the ratio of the 665 nm and 615 nm emission signals resulting from the FRET excitation of SA-APC at 615 nm and the laser excitation of Eu<sup>3+</sup>-VCB at 320 nm, respectively, multiplied by 10,000.

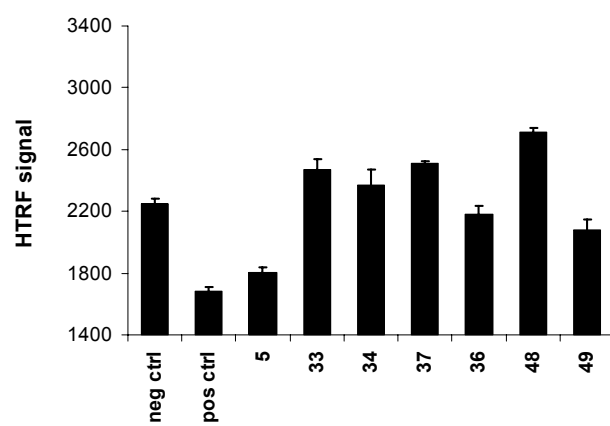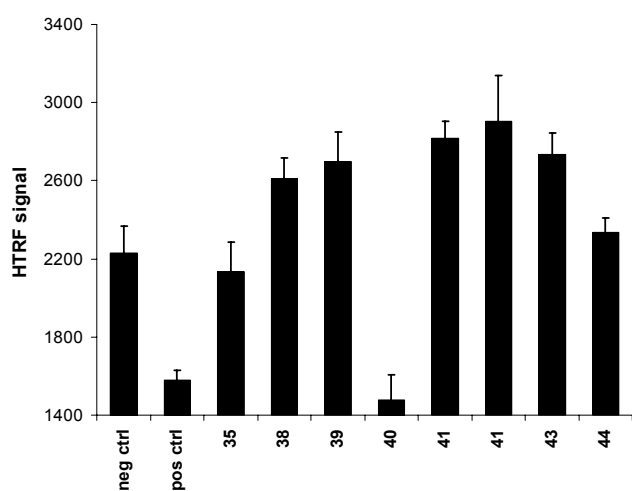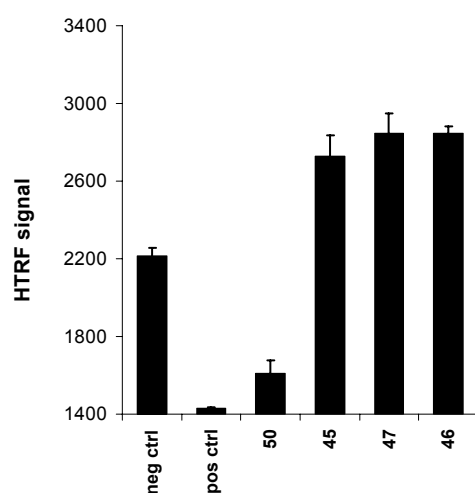

**Supporting Figure 1. Inhibition of PHD2 by the 3-substituted 2,4-PDCA analogues.** Compounds were screened against PDH2 (20 nM) at a compound concentration of 400  $\mu$ M. Error bars are standard deviations from 3 replicate measurements.

## Synthesis

### General

All reactions involving moisture sensitive reagents were carried out under a nitrogen atmosphere. Oven-dried glassware was used throughout. Cooling was performed in ice-water baths (0 °C) or dry ice-acetone baths (-78 °C). Anhydrous solvents were obtained from solvent stills and were activated by passing over a short column of activated alumina. Reagents were obtained from Acros, Aldrich, Avocado, Fluka, or Lancaster fine chemical suppliers and used as supplied. Thin layer chromatography (TLC) was performed on Merck DC-Kieselgel 60 F<sub>254</sub> 0.2 mm precoated plates with fluorescence indicator. Visualization of spots was achieved using UV light (254 nm) and by developing in a basic solution of KMnO<sub>4</sub> or a 3% ninhydrin solution, followed by heating. Chromatography was performed using a Biotage SP4 chromatography system, using prepacked Biotage KP-SIL SNAP columns, or by filtration through silica purchased from VWR (40–63 μm particle size). <sup>1</sup>H NMR spectra were recorded on a Bruker AC200 (200 MHz), Bruker AV400 (400 MHz) or Bruker Avance AV500 (500 MHz) spectrometer and referenced to residual solvent peaks. Chemical shifts are quoted in parts per million (ppm). Assignments were made on the basis of chemical shifts, coupling constants (*J*), <sup>13</sup>C, DEPT, COSY, HMQC data and comparison with spectra of related compounds. Resonances are described as s (singlet), d (doublet), t (triplet), q (quartet), quin (quintet), m (multiplet), and brs (broad singlet). Coupling constants are given in Hz and are reported to the nearest 0.5 Hz. <sup>13</sup>C NMR spectra were recorded on a Bruker AV400 spectrometer at 100 MHz or a Bruker Avance AV500 spectrometer (fitted with an inverse cryoprobe for <sup>13</sup>C observation) at 125 MHz and referenced to CDCl<sub>3</sub> or DMSO-*d*<sub>6</sub>. <sup>19</sup>F NMR spectra were recorded on a Bruker AV400 spectrometer at 377 MHz. Infra-red (IR) spectra were recorded on a Bruker Tensor 27 FT-IR spectrophotometer as KBr disks or films on sodium chloride plates (from CH<sub>2</sub>Cl<sub>2</sub>). Selected absorption maxima (*v*<sub>max</sub>) are given in wavenumbers (cm<sup>-1</sup>) and are uncorrected. High resolution mass spectra (HRMS) were recorded under the conditions of electrospray ionization on a Bruker MicroTOF. Melting points were recorded on a Leica VMTG heated-stage microscope melting point apparatus. Elemental analyses were performed at London Metropolitan University, London, U.K. All compounds used in inhibition assays were prepared as described in the example procedures in the main text or in the following Supporting Information and were analytically pure as determined by CHN microanalysis or analytical HPLC (>95% pure).

## Detailed synthetic procedures

### Dimethyl 3-(4-methoxyphenylamino)pyridine-2,4-dicarboxylate **19**

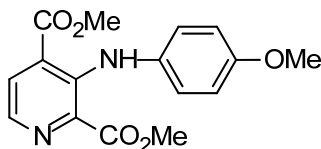

A stirred suspension of 3-bromopyridine **14** (200 mg, 0.73 mmol, 1 eq.), *p*-anisidine (107 mg, 0.88 mmol, 1.2 eq.), Cs<sub>2</sub>CO<sub>3</sub> (333 mg, 1.02 mmol, 1.4 eq.), Pd<sub>2</sub>(dba)<sub>3</sub> (13 mg, 0.014 mmol, 2 mol%) and 4,5-bis(diphenylphosphino)-9,9-dimethylxanthene (25 mg, 0.044 mmol, 6 mol%) in anhydrous toluene (5 cm<sup>3</sup>) was heated to 150 °C for 3 h in a Biotage Initiator microwave oven. The reaction mixture was directly purified by automated flash column chromatography (Biotage KP-SIL SNAP 25 g cartridge, eluting with EtOAc/hexane) to afford **19** (165 mg, 71%) as a yellow oil;  $\nu_{\max}$  (film)/cm<sup>-1</sup> 2951, 1732, 1692, 1512, 1287, 1242, 1196 and 1164;  $\delta_{\text{H}}$  (400 MHz; CDCl<sub>3</sub>) 3.52 (3 H, s, OCH<sub>3</sub>), 3.79 (3 H, s, OCH<sub>3</sub>), 3.82 (3 H, s, OCH<sub>3</sub>), 6.84 (2 H, d, *J* 9.0 Hz, ArH), 6.99 (2 H, d, *J* 9.0 Hz, ArH), 7.60 (1 H, d, *J* 4.5 Hz, pyH), 8.17 (1 H, d, *J* 4.5 Hz, pyH) and 9.50 (1 H, s, NH);  $\delta_{\text{C}}$  (100 MHz; CDCl<sub>3</sub>) 52.3, 52.7, 55.5, 114.6, 122.5, 125.9, 127.6, 135.0, 138.2, 142.5, 156.5, 166.9 and 167.3; *m/z* (ESI+) 339.0950 (M + Na<sup>+</sup>. C<sub>16</sub>H<sub>16</sub>N<sub>2</sub>NaO<sub>5</sub> requires 339.0951).

### Dimethyl 3-(4-nitrophenylamino)pyridine-2,4-dicarboxylate **20**

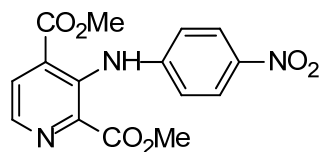

A stirred suspension of 3-bromopyridine **14** (150 mg, 0.55 mmol, 1 eq.), 4-nitroaniline (91 mg, 0.66 mmol, 1.2 eq.), Cs<sub>2</sub>CO<sub>3</sub> (250 mg, 0.77 mmol, 1.4 eq.), Pd<sub>2</sub>(dba)<sub>3</sub> (10 mg, 0.011 mmol, 2 mol%) and 4,5-bis(diphenylphosphino)-9,9-dimethylxanthene (19 mg, 0.033 mmol, 6 mol%) in anhydrous toluene (3 cm<sup>3</sup>) was heated to 150 °C for 6 h in a Biotage Initiator microwave oven. The reaction mixture was directly purified by automated flash column chromatography (Biotage KP-SIL SNAP 25 g cartridge, eluting with EtOAc/hexane) to afford **20** (81 mg, 45%) as a brown solid (Found: C, 51.37; H, 2.92; N, 13.76. C<sub>13</sub>H<sub>9</sub>N<sub>3</sub>O<sub>6</sub>

requires C, 51.49; H, 2.99; N, 13.86%); mp 139-142 °C;  $\nu_{\max}$  (KBr disk)/ $\text{cm}^{-1}$  3439, 3066, 1740, 1722, 1704, 1596, 1502 and 1335;  $\delta_{\text{H}}$  (400 MHz;  $\text{CDCl}_3$ ) 3.67 (3 H, s,  $\text{OCH}_3$ ), 3.89 (3 H, s,  $\text{OCH}_3$ ), 7.00 (2 H, d,  $J$  9.0 Hz,  $\text{ArH}$ ), 7.83 (1 H, d,  $J$  5.0 Hz,  $\text{pyH}$ ), 8.16 (2 H, d,  $J$  9.0 Hz,  $\text{ArH}$ ), 8.46 (1 H, d,  $J$  5.0 Hz,  $\text{pyH}$ ) and 9.70 (1 H, s,  $\text{NH}$ );  $\delta_{\text{C}}$  (125 MHz;  $\text{CDCl}_3$ ) 52.9, 53.2, 116.7, 125.7, 127.7, 128.8, 138.30 and 138.32, 142.18 and 142.34, 148.4, 165.8 and 166.6;  $m/z$  (ESI+) 354.0694 ( $\text{M} + \text{Na}^+$ .  $\text{C}_{15}\text{H}_{13}\text{N}_3\text{NaO}_6$  requires 354.0697).

### Dimethyl 3-(4-(methoxycarbonyl)phenylamino)pyridine-2,4-dicarboxylate **21**

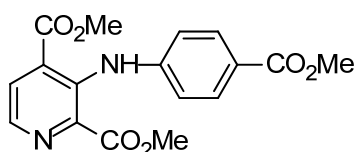

A stirred suspension of 3-bromopyridine **14** (250 mg, 0.91 mmol, 1 eq.), methyl 4-aminobenzoate (193 mg, 1.28 mmol, 1.4 eq.),  $\text{Cs}_2\text{CO}_3$  (416 mg, 1.28 mmol, 1.4 eq.),  $\text{Pd}_2(\text{dba})_3$  (17 mg, 0.018 mmol, 2 mol%) and 4,5-bis(diphenylphosphino)-9,9-dimethylxanthene (32 mg, 0.055 mmol, 6 mol%) in anhydrous toluene (4  $\text{cm}^3$ ) was heated to 150 °C for 1 hr in a Biotage Initiator microwave oven. The reaction mixture was directly purified by automated flash column chromatography (Biotage KP-SIL SNAP 25 g cartridge, eluting with EtOAc/hexane) to afford **21** (166 mg, 53%) as an orange solid; mp 115-117 °C;  $\nu_{\max}$  (KBr disk)/ $\text{cm}^{-1}$  3326, 2954, 1732, 1712, 1606, 1584, 1437, 1414, 1286, 1194 and 1170;  $\delta_{\text{H}}$  (400 MHz;  $\text{CDCl}_3$ ) 3.54 (3 H, s,  $\text{OCH}_3$ ), 3.82 (3 H, s,  $\text{OCH}_3$ ), 3.86 (3 H, s,  $\text{OCH}_3$ ), 6.97 (2 H, d,  $J$  8.5 Hz,  $\text{ArH}$ ), 7.72 (1 H, d,  $J$  4.5 Hz,  $\text{pyH}$ ), 7.93 (2 H, d,  $J$  8.5 Hz,  $\text{ArH}$ ), 8.33 (1 H, d,  $J$  4.5 Hz,  $\text{pyH}$ ) and 9.62 (1 H, s,  $\text{NH}$ );  $\delta_{\text{C}}$  (100 MHz;  $\text{CDCl}_3$ ) 51.9, 52.5, 52.9, 117.3, 124.4, 127.6, 127.8, 131.2, 137.1, 139.5, 140.7, 146.4, 166.1, 166.4 and 166.8;  $m/z$  (ESI+) 367.0902 ( $\text{M} + \text{Na}^+$ .  $\text{C}_{17}\text{H}_{16}\text{N}_2\text{NaO}_6$  requires 367.0901).



### Dimethyl 3-(2,4-difluorophenylamino)pyridine-2,4-dicarboxylate **22**

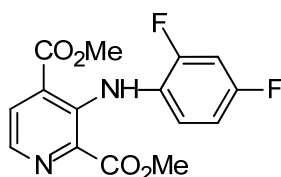

A stirred suspension of 3-bromopyridine **14** (250 mg, 0.91 mmol, 1 eq.), 2,4-difluoroaniline (130  $\mu$ L, 1.28 mmol, 1.4 eq.), Cs<sub>2</sub>CO<sub>3</sub> (416 mg, 1.28 mmol, 1.4 eq.), Pd<sub>2</sub>(dba)<sub>3</sub> (17 mg, 0.018 mmol, 2 mol%) and 4,5-bis(diphenylphosphino)-9,9-dimethylxanthene (32 mg, 0.055 mmol, 6 mol%) in anhydrous toluene (4 cm<sup>3</sup>) was heated to 150 °C for 1 h in a Biotage Initiator microwave oven. The reaction mixture was directly purified by automated flash column chromatography (Biotage KP-SIL SNAP 25 g cartridge, eluting with EtOAc/hexane) to afford **22** (182 mg, 62%) as a yellow solid; mp 137-140 °C;  $\nu_{\max}$  (KBr disk)/cm<sup>-1</sup> 3303, 3081, 3063, 2951, 1724, 1690, 1516, 1435, 1296, 1241, 1197, 1169;  $\delta_{\text{H}}$  (500 MHz; CDCl<sub>3</sub>) 3.60 (3 H, s, OCH<sub>3</sub>), 3.85 (3 H, s, OCH<sub>3</sub>), 6.77-6.83 (1 H, m, ArH), 6.88-6.94 (1 H, m, ArH), 6.98-7.05 (1 H, m, ArH), 7.66 (1 H, d, *J* 4.5 Hz, pyH), 8.26 (1 H, d, *J* 4.5 Hz, pyH) and 9.37 (1 H, s, NH);  $\delta_{\text{C}}$  (125 MHz; CDCl<sub>3</sub>) 52.5, 52.9, 104.9, 111.1, 122.5, 126.2, 126.3, 127.5, 135.7, 139.4, 141.6, 155.7, 159.1, 166.4 and 167.1; *m/z* (ESI+) 345.0652 (M + Na<sup>+</sup>. C<sub>15</sub>H<sub>12</sub>F<sub>2</sub>N<sub>2</sub>NaO<sub>4</sub> requires 345.0657).

### Dimethyl 3-(2-(methylthio)phenylamino)pyridine-2,4-dicarboxylate **23**

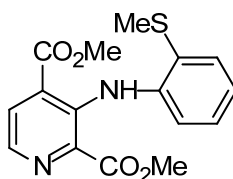

A stirred suspension of 3-bromopyridine **14** (250 mg, 0.91 mmol, 1 eq.), 2-methylthioaniline (229  $\mu$ L, 1.82 mmol, 2 eq.), Cs<sub>2</sub>CO<sub>3</sub> (416 mg, 1.28 mmol, 1.4 eq.), Pd<sub>2</sub>(dba)<sub>3</sub> (16 mg, 18  $\mu$ mol, 2 mol%) and 4,5-bis(diphenylphosphino)-9,9-dimethylxanthene (32 mg, 55  $\mu$ mol, 6 mol%) in anhydrous toluene (4 cm<sup>3</sup>) was heated to 125 °C for 90 min in a Biotage Initiator microwave oven. The reaction mixture was directly purified by automated flash column chromatography (Biotage KP-SIL SNAP 25 g cartridge, eluting with EtOAc/hexane) to afford **23** (259 mg, 85%) as a deep yellow oil;  $\nu_{\max}$  (film)/cm<sup>-1</sup> 3288, 2951, 1733, 1698, 1583,

1502, 1438, 1286, 1197 and 1166;  $\delta_{\text{H}}$  (500 MHz;  $\text{CDCl}_3$ ) 2.46 (3 H, s,  $\text{SCH}_3$ ), 3.47 (3 H, s,  $\text{OCH}_3$ ), 3.77 (3 H, s,  $\text{OCH}_3$ ), 6.85 (1 H, d,  $J$  7.5 Hz,  $\text{ArH}$ ), 6.94-7.09 (1 H, m,  $\text{ArH}$ ), 6.99 (1 H, d,  $J$  8.5 Hz,  $\text{ArH}$ ), 7.30 (1 H, d,  $J$  7.5 Hz,  $\text{ArH}$ ), 7.64 (1 H, d,  $J$  4.5 Hz,  $\text{pyH}$ ), 8.21 (1 H, d,  $J$  4.5 Hz,  $\text{pyH}$ ) and 9.60 (1 H, s,  $\text{NH}$ );  $\delta_{\text{C}}$  (126 MHz;  $\text{CDCl}_3$ ) 15.7, 52.3, 52.8, 116.8, 124.1, 126.3, 126.8, 127.6, 128.9, 130.2, 136.2, 139.3, 140.7, 141.0, 166.4 and 166.8;  $m/z$  (ESI+) 355.0719 ( $\text{M} + \text{Na}^+$ .  $\text{C}_{16}\text{H}_{16}\text{N}_2\text{NaO}_4\text{S}$  requires 355.0723).

#### Dimethyl 3-(2-(methoxycarbonyl)phenylamino)pyridine-2,4-dicarboxylate **24**

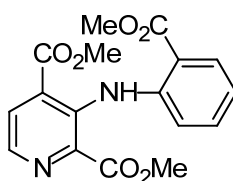

A stirred suspension of 3-bromopyridine **14** (200 mg, 0.73 mmol, 1 eq.), methyl anthranilate (190  $\mu\text{L}$ , 1.46 mmol, 2 eq.),  $\text{Cs}_2\text{CO}_3$  (333 mg, 1.02 mmol, 1.4 eq.),  $\text{Pd}_2(\text{dba})_3$  (13 mg, 14  $\mu\text{mol}$ , 2 mol%) and 4,5-bis(diphenylphosphino)-9,9-dimethylxanthene (25 mg, 44  $\mu\text{mol}$ , 6 mol%) in anhydrous toluene (4  $\text{cm}^3$ ) was heated to 150  $^\circ\text{C}$  for 15 min in a Biotage Initiator microwave oven. The reaction mixture was directly purified by automated flash column chromatography (Biotage KP-SIL SNAP 25 g cartridge, eluting with  $\text{EtOAc}$ /hexane) to afford **24** (151 mg, 60%) as a yellow oil;  $\nu_{\text{max}}$  (film)/ $\text{cm}^{-1}$  2952, 1733, 1704, 1584, 1504, 1450, 1436, 1252, 1195 and 1165;  $\delta_{\text{H}}$  (400 MHz;  $\text{CDCl}_3$ ) 3.54 (3 H, s,  $\text{OCH}_3$ ), 3.79 (3 H, s,  $\text{OCH}_3$ ), 3.95 (3 H, s,  $\text{OCH}_3$ ), 6.85-6.94 (2 H, m,  $\text{ArH}$ ), 7.26 (1 H, t,  $J$  7.5 Hz,  $\text{ArH}$ ), 7.71 (1 H, d,  $J$  5.0 Hz,  $\text{pyH}$ ), 7.94 (1 H, dd,  $J$  7.5, 1.0 Hz,  $\text{ArH}$ ), 8.33 (1 H, d,  $J$  5.0 Hz,  $\text{pyH}$ ) and 11.02 (1 H, s,  $\text{NH}$ );  $\delta_{\text{C}}$  (100 MHz;  $\text{CDCl}_3$ ) 52.2, 52.4, 52.8, 114.4, 117.0, 120.7, 127.2, 129.4, 131.6, 133.4, 138.1, 139.6, 141.1, 144.7, 165.9, 166.0 and 167.5;  $m/z$  367.0894 ( $\text{M} + \text{Na}^+$ .  $\text{C}_{17}\text{H}_{16}\text{N}_2\text{NaO}_6$  requires 367.0901).

### Dimethyl 3-(2-nitrophenylamino)pyridine-2,4-dicarboxylate **25**

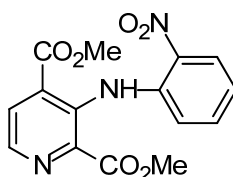

A stirred suspension of 3-bromopyridine **14** (250 mg, 0.91 mmol, 1 eq.), 2-nitroaniline (252 mg, 1.82 mmol, 2 eq.), Cs<sub>2</sub>CO<sub>3</sub> (416 mg, 1.28 mmol, 1.4 eq.), Pd<sub>2</sub>(dba)<sub>3</sub> (16 mg, 18 μmol, 2 mol%) and 4,5-bis(diphenylphosphino)-9,9-dimethylxanthene (25 mg, 44 μmol, 6 mol%) in anhydrous toluene (4 cm<sup>3</sup>) was heated to 150 °C for 10 min in a Biotage Initiator microwave oven. The reaction mixture was directly purified by automated flash column chromatography (Biotage KP-SIL SNAP 25 g cartridge, eluting with EtOAc/hexane) to afford **25** (158 mg, 65%) as a yellow solid; mp 146-150 °C;  $\nu_{\max}$  (KBr disk)/cm<sup>-1</sup> 3422, 3295, 1719, 1700, 1498, 1434, 1274, 1197 and 1166;  $\delta_{\text{H}}$  (400 MHz; CDCl<sub>3</sub>) 3.60 (3 H, s, OCH<sub>3</sub>), 3.79 (3 H, s, OCH<sub>3</sub>), 6.88-7.02 (2 H, m, ArH), 7.36 (1 H, t, *J* 7.0 Hz, ArH), 7.79 (1 H, d, *J* 5.0 Hz, pyH), 8.11 (1 H, dd, *J* 8.5, 1.5 Hz, ArH), 8.45 (1 H, d, *J* 5.0 Hz, pyH) and 10.83 (1 H, s, NH);  $\delta_{\text{C}}$  (100 MHz; CDCl<sub>3</sub>) 52.8, 53.1, 116.6, 121.1, 126.5, 127.4, 130.4, 134.8, 136.9, 138.0, 139.4, 140.6, 143.0, 165.5 and 165.8; *m/z* (ESI+) 354.0701 (M + Na<sup>+</sup>. C<sub>15</sub>H<sub>13</sub>N<sub>3</sub>NaO<sub>6</sub> requires 354.0697).

### Dimethyl 3-(2-methoxyphenylamino)pyridine-2,4-dicarboxylate **26**

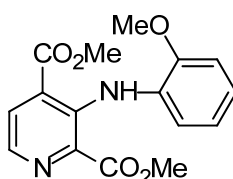

A stirred suspension of 3-bromopyridine **14** (200 mg, 0.73 mmol, 1 eq.), *o*-anisidine (165 μL, 1.46 mmol, 2 eq.), Cs<sub>2</sub>CO<sub>3</sub> (333 mg, 1.02 mmol, 1.4 eq.), Pd<sub>2</sub>(dba)<sub>3</sub> (13 mg, 15 μmol, 2 mol%) and 4,5-bis(diphenylphosphino)-9,9-dimethylxanthene (25 mg, 44 μmol, 6 mol%) in anhydrous toluene (4 cm<sup>3</sup>) was heated to 150 °C for 10 min in a Biotage Initiator microwave oven. The reaction mixture was directly purified by automated flash column chromatography (Biotage KP-SIL SNAP 25 g cartridge, eluting with EtOAc/hexane) to afford **26** (169 mg, 73%) as a yellow oil;  $\nu_{\max}$  (film)/cm<sup>-1</sup> 3319, 2951, 1733, 1698, 1598, 1560, 1512, 1437, 1287

and 1244;  $\delta_{\text{H}}$  (400 MHz;  $\text{CDCl}_3$ ) 3.49 (3 H, s,  $\text{OCH}_3$ ), 3.80 (3 H, s,  $\text{OCH}_3$ ), 3.87 (3 H, s,  $\text{OCH}_3$ ), 6.82 (1 H, t,  $J$  7.5 Hz,  $\text{ArH}$ ), 6.87-6.96 (2 H, m,  $\text{ArH}$ ), 7.02 (1 H,  $\text{ArH}$ ), 7.63 (1 H, d,  $J$  4.5 Hz,  $\text{pyH}$ ), 8.19 (1 H, d,  $J$  4.5 Hz,  $\text{pyH}$ ) and 9.44 (1 H, s,  $\text{NH}$ );  $\delta_{\text{C}}$  (100 MHz;  $\text{CDCl}_3$ ) 52.2, 52.7, 55.7, 111.3, 118.0, 120.5, 124.2, 126.6, 127.4, 130.9, 135.9, 138.7, 141.3, 151.2, 166.6 and 167.0;  $m/z$  (ESI+) 339.0948 ( $\text{M} + \text{Na}^+$ .  $\text{C}_{16}\text{H}_{16}\text{N}_2\text{NaO}_5$  requires 339.0951).

### Dimethyl 3-(*o*-tolylamino)pyridine-2,4-dicarboxylate **27**

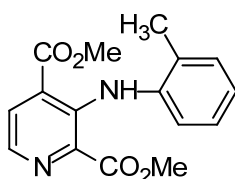

A stirred suspension of 3-bromopyridine **14** (200 mg, 0.73 mmol, 1 eq.), *o*-toluidine (156  $\mu\text{L}$ , 1.46 mmol, 2 eq.),  $\text{Cs}_2\text{CO}_3$  (333 mg, 1.02 mmol, 1.4 eq.),  $\text{Pd}_2(\text{dba})_3$  (13 mg, 15  $\mu\text{mol}$ , 2 mol%) and 4,5-bis(diphenylphosphino)-9,9-dimethylxanthene (25 mg, 44  $\mu\text{mol}$ , 6 mol%) in anhydrous toluene (4  $\text{cm}^3$ ) was heated to 150  $^\circ\text{C}$  for 10 min in a Biotage Initiator microwave oven. The reaction mixture was directly purified by automated flash column chromatography (Biotage KP-SIL SNAP 25 g cartridge, eluting with EtOAc/hexane) to afford **27** (126 mg, 58%) as a yellow solid. mp 110-112  $^\circ\text{C}$ ;  $\nu_{\text{max}}$  (KBr disk)/ $\text{cm}^{-1}$  3297, 2945, 1726, 1681, 1585, 1502, 1433, 1366, 1276, 1194 and 1166;  $\delta_{\text{H}}$  (400 MHz;  $\text{CDCl}_3$ ) 2.37 (3 H, s,  $\text{CH}_3$ ), 3.44 (3 H, s,  $\text{OCH}_3$ ), 3.80 (3 H, s,  $\text{OCH}_3$ ), 6.90 (1 H, d,  $J$  8.0 Hz,  $\text{ArH}$ ), 7.02 (1 H, d,  $J$  7.5 Hz,  $\text{ArH}$ ), 7.08 (1 H, t,  $J$  7.0 Hz,  $\text{ArH}$ ), 7.24 (1 H, d,  $J$  7.5 Hz,  $\text{ArH}$ ), 7.61 (1 H, d,  $J$  4.5 Hz,  $\text{pyH}$ ), 8.19 (1 H, d,  $J$  4.5 Hz,  $\text{pyH}$ ) and 9.37 (1 H, s,  $\text{NH}$ );  $\delta_{\text{C}}$  (100 MHz,  $\text{CDCl}_3$ ) 18.0, 52.1, 52.7, 118.9, 124.5, 126.1, 126.6, 127.5, 131.0, 131.3, 135.2, 138.4, 140.5, 142.4, 166.8 and 167.3;  $m/z$  (ESI+) 323.1000 ( $\text{M} + \text{Na}^+$ .  $\text{C}_{16}\text{H}_{16}\text{N}_2\text{NaO}_4$  requires 323.1002).

### Dimethyl 3-(2-fluorophenylamino)pyridine-2,4-dicarboxylate **28**

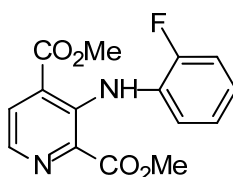

A stirred suspension of 3-bromopyridine **14** (200 mg, 0.73 mmol, 1 eq.), 2-fluoroaniline (141  $\mu\text{L}$ , 1.46 mmol, 2 eq.),  $\text{Cs}_2\text{CO}_3$  (333 mg, 1.02 mmol, 1.4 eq.),  $\text{Pd}_2(\text{dba})_3$  (13 mg, 15  $\mu\text{mol}$ , 2 mol%) and 4,5-bis(diphenylphosphino)-9,9-dimethylxanthene (25 mg, 44  $\mu\text{mol}$ , 6 mol%) in anhydrous toluene (4  $\text{cm}^3$ ) was heated to 150  $^\circ\text{C}$  for 15 min in a Biotage Initiator microwave oven. The reaction mixture was directly purified by automated flash column chromatography (Biotage KP-SIL SNAP 25 g cartridge, eluting with EtOAc/hexane) to afford **28** (169 mg, 76%) as a yellow oil;  $\nu_{\text{max}}$  (film)/ $\text{cm}^{-1}$  3302, 2952, 1733, 1698, 1513, 1288, 1197 and 1167;  $\delta_{\text{H}}$  (400 MHz;  $\text{CDCl}_3$ ) 3.53 (3 H, s,  $\text{OCH}_3$ ), 3.82 (3 H, s,  $\text{OCH}_3$ ), 6.97-7.05 (3 H, m,  $\text{ArH}$ ), 7.08-7.16 (1 H, m,  $\text{ArH}$ ), 7.67 (1 H, d,  $J$  4.5 Hz,  $\text{pyH}$ ), 8.26 (1 H, d,  $J$  4.5 Hz,  $\text{pyH}$ ) and 9.44 (1 H, s,  $\text{NH}$ );  $\delta_{\text{C}}$  (100 MHz;  $\text{CDCl}_3$ ) 52.4, 52.8, 116.3, 120.3, 124.3, 124.7, 126.8, 127.6, 130.0, 136.1, 139.6, 141.1, 155.2, 166.5 and 167.0;  $\delta_{\text{F}}$  (377 MHz;  $\text{CDCl}_3$ ) -125.6;  $m/z$  (ESI+) 327.0752 ( $\text{M} + \text{Na}^+$ .  $\text{C}_{15}\text{H}_{13}\text{FN}_2\text{NaO}_4$  requires 327.0752).

### Dimethyl 3-(naphthalen-1-ylamino)pyridine-2,4-dicarboxylate **29**

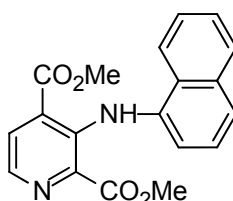

A stirred suspension of 3-bromopyridine **14** (200 mg, 0.73 mmol, 1 eq.), 1-naphthylamine (209 mg, 1.46 mmol, 2 eq.),  $\text{Cs}_2\text{CO}_3$  (333 mg, 1.02 mmol, 1.4 eq.),  $\text{Pd}_2(\text{dba})_3$  (13 mg, 15  $\mu\text{mol}$ , 2 mol%) and 4,5-bis(diphenylphosphino)-9,9-dimethylxanthene (25 mg, 44  $\mu\text{mol}$ , 6 mol%) in anhydrous toluene (4  $\text{cm}^3$ ) was heated to 150  $^\circ\text{C}$  for 15 min in a Biotage Initiator microwave oven. The reaction mixture was directly purified by automated flash column chromatography (Biotage KP-SIL SNAP 25 g cartridge, eluting with EtOAc/hexane) to afford **29** (171 mg, 70%) as a deep yellow oil.  $\nu_{\text{max}}$  (KBr disk)/ $\text{cm}^{-1}$  3433, 3304, 3046, 3005, 2949, 1730, 1711, 1692, 1584, 1475, 1458, 1443, 1430, 1282, 1198 and 1169;  $\delta_{\text{H}}$  (400 MHz;

CDCl<sub>3</sub>) 3.09 (3 H, s, OCH<sub>3</sub>), 3.68 (3 H, s, OCH<sub>3</sub>), 7.07 (1 H, d, *J* 7.5 Hz, Ar*H*), 7.29 (1 H, t, *J* 8.0 Hz, Ar*H*), 7.53 (2 H, td, *J* 8.0, 1.5 Hz, Ar*H*), 7.56-7.60 (1 H, m, Ar*H*), 7.60 (1 H, d, *J* 5.0 Hz, py*H*), 7.83 (1 H, d, *J* 7.5 Hz, Ar*H*), 8.21 (1 H, d, *J* 5.0 Hz, py*H*), 8.25 (1 H, d, *J* 8.5 Hz, Ar*H*) and 9.87 (1 H, s, NH); δ<sub>C</sub> (100 MHz; CDCl<sub>3</sub>) 52.0, 52.7, 115.5, 122.1, 124.9, 125.4, 126.5, 126.7, 127.7, 128.2, 128.5, 134.5, 135.5, 138.5, 138.9, 143.0, 166.8 and 167.5; *m/z* (ESI<sup>+</sup>) 359.0995 (M + Na<sup>+</sup>. C<sub>19</sub>H<sub>16</sub>N<sub>2</sub>NaO<sub>4</sub> requires 359.1002).

### Dimethyl 3-(4-methoxybenzylamino)pyridine-2,4-dicarboxylate **31**

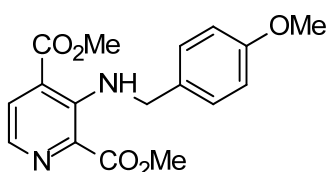

A stirred suspension of 3-bromopyridine **14** (500 mg, 1.82 mmol, 1 eq.), 4-methoxybenzylamine (290 μL, 2.19 mmol, 1.2 eq.), Cs<sub>2</sub>CO<sub>3</sub> (830 mg, 2.55 mmol, 1.4 eq.), Pd<sub>2</sub>(dba)<sub>3</sub> (30 mg, 0.037 mmol, 2 mol%) and 4,5-bis(diphenylphosphino)-9,9-dimethylxanthene (60 mg, 0.109 mmol, 6 mol%) in anhydrous toluene (15 cm<sup>3</sup>) was heated to 110 °C for 12 h in a Biotage Initiator microwave oven. The reaction mixture was directly purified by automated flash column chromatography to afford **31** (418 mg, 69%) as a yellow solid (Found: C, 61.84; H, 5.46; N, 8.39. C<sub>17</sub>H<sub>18</sub>N<sub>2</sub>O<sub>5</sub> requires C, 61.81; H, 5.49; N, 8.48%); mp 60-64 °C; ν<sub>max</sub> (film)/cm<sup>-1</sup> 3329, 2953, 1726, 1697, 1513, 1439, 1295, 1249, 1194 and 1164; δ<sub>H</sub> (400 MHz; CDCl<sub>3</sub>) 3.79 (s, 3 H, OCH<sub>3</sub>), 3.89 (3 H, s, OCH<sub>3</sub>), 3.95 (3 H, s, OCH<sub>3</sub>), 4.17 (2 H, s, NHCH<sub>2</sub>), 6.86 (2 H, d, *J* 9.0 Hz, Ar*H*), 7.20 (2 H, d, *J* 9.0 Hz, Ar*H*), 7.62 (1 H, d, *J* 5.0 Hz, py*H*) and 8.03 (1 H, d, *J* 5.0 Hz, py*H*); δ<sub>C</sub> (100 MHz; CDCl<sub>3</sub>) 50.4, 52.6, 52.8, 55.2, 114.1, 122.7, 127.5, 129.1, 129.9, 133.3, 135.9, 145.4, 159.1, 167.3 and 167.6; *m/z* (ESI<sup>+</sup>) 353.1103 (M + Na<sup>+</sup>. C<sub>17</sub>H<sub>18</sub>N<sub>2</sub>NaO<sub>5</sub> requires 353.1108).

### Dimethyl 3-aminopyridine-2,4-dicarboxylate **32**

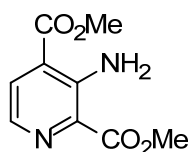

To a stirred solution of dimethyl ester **31** (146 mg, 0.44 mmol, 1 eq.) in  $\text{CH}_2\text{Cl}_2$  ( $1 \text{ cm}^3$ ) was added dropwise  $\text{CF}_3\text{CO}_2\text{H}$  ( $1 \text{ cm}^3$ ) while cooling in an ice bath. The resulting solution was stirred overnight. Volatiles were removed *in vacuo* and the residue purified by flash column chromatography (Biotage KP-SIL SNAP 25 g cartridge, eluting with EtOAc/hexane) to afford **32** (83 mg, 89%) as a pale yellow solid; mp 98-102 °C;  $\nu_{\text{max}}$  (film)/ $\text{cm}^{-1}$  3449, 3340, 2957, 1714, 1606, 1563, 1462, 1439, 1337 and 1303;  $\delta_{\text{H}}$  (400 MHz;  $\text{CDCl}_3$ ) 3.93 (3 H, s,  $\text{OCH}_3$ ), 3.97 (3 H, s,  $\text{OCH}_3$ ), 7.90 (1 H, d,  $J$  5.0 Hz, *pyH*), 7.96 (2 H, brs,  $\text{NH}_2$ ) and 8.03 (1 H, d,  $J$  5.0 Hz, *pyH*);  $\delta_{\text{C}}$  (100 MHz;  $\text{CDCl}_3$ ) 52.5, 52.6, 119.1, 128.9, 129.6, 134.9, 148.1, 166.7 and 166.9;  $m/z$  (ESI+) 233.0534 ( $\text{M} + \text{Na}^+$ ,  $\text{C}_9\text{H}_{10}\text{N}_2\text{NaO}_4$  requires 233.0533).

### 3-Bromopyridine-2,4-dicarboxylic acid **33**

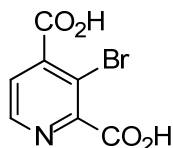

A solution of dimethyl ester **14** (100 mg, 0.36 mmol, 1 eq.) in MeOH ( $3 \text{ cm}^3$ ) was treated with a solution of NaOH (88 mg, 2.16 mmol, 6 eq.) in water ( $3 \text{ cm}^3$ ) and stirred for 6 h at room temperature. The reaction mixture was concentrated *in vacuo*, the residue dissolved in the minimum required amount of water, acidified with conc. HCl and extracted repeatedly with EtOAc. The combined organic layers were dried ( $\text{Na}_2\text{SO}_4$ ) and concentrated *in vacuo* to afford **33** (74 mg, 82%) as a pale pink solid (Found: C, 34.09; H, 1.56; N, 5.65.  $\text{C}_7\text{H}_4\text{BrNO}_4$  requires C, 34.17; H, 1.64; N, 5.69%); mp 244-246 °C (decomp.);  $\nu_{\text{max}}$  (KBr disk)/ $\text{cm}^{-1}$  3259, 2919, 2851, 1744, 1707, 1578 and 1355;  $\delta_{\text{H}}$  (400 MHz;  $\text{DMSO}-d_6$ ) 7.72 (1 H, d,  $J$  5.0 Hz, *pyH*), 8.65 (1 H, d,  $J$  5.0 Hz, *pyH*) and 14.02 (2 H, brs,  $\text{CO}_2\text{H}$ );  $\delta_{\text{C}}$  (125 MHz;  $\text{DMSO}-d_6$ ) 112.3, 123.9, 143.7, 148.5, 153.9, 166.1 and 166.8;  $m/z$  (ESI-) 243.9249 ( $\text{M} - \text{H}^+$ ,  $\text{C}_7\text{H}_3\text{BrNO}_4$  requires 243.9251);

### 3-(4-Methoxyphenylamino)pyridine-2,4-dicarboxylic acid **38**

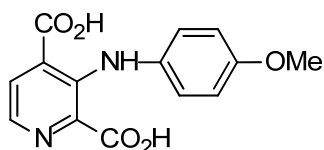

A solution of dimethyl ester **19** (110 mg, 0.35 mmol, 1 eq.) in MeOH (4 cm<sup>3</sup>) was treated with aq. NaOH (20% w/v, 1 cm<sup>3</sup>) and stirred overnight at room temperature. The reaction mixture was concentrated *in vacuo*, the residue dissolved in the minimum required amount of water and acidified with conc. HCl. The precipitated product was filtered off and recrystallised from water/MeOH to afford **38** (85 mg, 85%) as a deep red solid (Found: C, 58.20; H, 4.14; N, 9.80. C<sub>14</sub>H<sub>12</sub>N<sub>2</sub>O<sub>5</sub> requires C, 58.33; H, 4.20; N, 9.72%); mp >200 °C (decomp.);  $\nu_{\max}$  (KBr disk)/cm<sup>-1</sup> 3444, 3016, 1702, 1640, 1522, 1446, 1237 and 1154;  $\delta_{\text{H}}$  (400 MHz; DMSO-*d*<sub>6</sub>) 3.71 (3 H, s, OCH<sub>3</sub>), 6.82 (2 H, d, *J* 9.0 Hz, Ar*H*), 6.95 (2 H, d, *J* 9.0 Hz, Ar*H*), 7.69 (1 H, d, *J* 5.0 Hz, py*H*), 8.11 (1 H, d, *J* 5.0 Hz, py*H*) and 9.48 (1 H, brs, NH);  $\delta_{\text{C}}$  (100 MHz; DMSO-*d*<sub>6</sub>) 55.2, 114.3, 121.8, 127.1, 127.3, 135.5, 137.1, 137.8, 141.0, 155.6, 167.5 and 167.8; *m/z* (ESI-) 287.0666 (M – H<sup>+</sup>. C<sub>14</sub>H<sub>11</sub>N<sub>2</sub>O<sub>5</sub> requires 287.0673).

### 3-(4-Nitrophenylamino)pyridine-2,4-dicarboxylic acid **39**

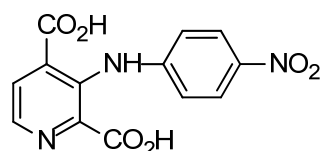

A solution of dimethyl ester **20** (60 mg, 0.181 mmol, 1 eq.) in MeOH (1 cm<sup>3</sup>) was treated with aq. NaOH (20% w/v, 1 cm<sup>3</sup>) and stirred overnight at room temperature. The reaction mixture was concentrated *in vacuo*, the residue dissolved in the minimum required amount of water and acidified with conc. HCl. The precipitated product was filtered off and dried under high vacuum to afford **39** (30 mg, 55%) as a yellow solid; mp >160 °C (decomp.);  $\nu_{\max}$  (KBr disk)/cm<sup>-1</sup> 3159, 2991, 1722, 1658, 1596, 1527, 1502, 1469, 1340, 1288 and 1260;  $\delta_{\text{H}}$  (500 MHz; DMSO-*d*<sub>6</sub>) 6.77 (2 H, d, *J* 9.0 Hz, Ar*H*), 7.86 (1 H, d, *J* 5.0 Hz, py*H*), 8.04 (2 H, d, *J* 9.0 Hz, Ar*H*), 8.59 (1 H, d, *J* 5.0 Hz, py*H*), 9.34 (1 H, brs, NH) and 13.58 (brs, CO<sub>2</sub>H);  $\delta_{\text{C}}$  (125 MHz; DMSO-*d*<sub>6</sub>) 114.0, 125.7, 125.9, 132.5, 136.7, 138.7, 145.9, 148.1, 152.1, 166.2 and 166.8; *m/z* (ESI-) 302.0420 (M – H<sup>+</sup>. C<sub>13</sub>H<sub>8</sub>N<sub>3</sub>O<sub>6</sub> requires 302.0419).



### 3-(4-Carboxyphenylamino)pyridine-2,4-dicarboxylic acid **40**

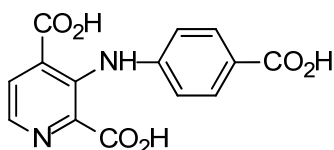

A solution of dimethyl ester **21** (166 mg, 0.166 mmol, 1 eq.) in MeOH (4 cm<sup>3</sup>) was treated with aq. NaOH (20% w/v, 1 cm<sup>3</sup>) and stirred overnight at room temperature. The reaction mixture was concentrated *in vacuo*, the residue dissolved in the minimum required amount of water, acidified with conc. HCl and extracted with EtOAc (3 × 5 cm<sup>3</sup>). The combined organic layers were dried (Na<sub>2</sub>SO<sub>4</sub>) and concentrated *in vacuo* to afford **40** (92 mg, 63%) as a yellow solid; mp >200 °C (decomp.);  $\nu_{\max}$  (KBr disk)/cm<sup>-1</sup> 3471, 2968, 1716, 1668, 1604, 1526 and 1277;  $\delta_{\text{H}}$  (400 MHz; DMSO-*d*<sub>6</sub>) 6.85 (2 H, d, *J* 8.5 Hz, ArH), 7.74 (2 H, d, *J* 8.5 Hz, ArH), 7.81 (1 H, d, *J* 5.0 Hz, pyH), 8.41 (1 H, d, *J* 5.0 Hz, pyH), 9.21 (1 H, br s, NH) and 12.78 (br s, CO<sub>2</sub>H);  $\delta_{\text{C}}$  (100 MHz; DMSO-*d*<sub>6</sub>) 52.5, 116.2, 121.8, 127.2, 131.5, 134.3, 136.1, 144.0, 145.1, 149.7, 166.8, 167.5 and 168.0; *m/z* (ESI-) 301.0486 (M – H<sup>+</sup>. C<sub>14</sub>H<sub>9</sub>N<sub>2</sub>O<sub>6</sub> requires 301.0466).

### 3-(2,4-Difluorophenylamino)pyridine-2,4-dicarboxylic acid **41**

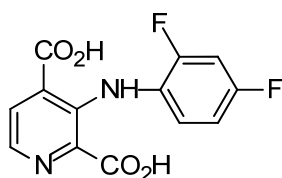

A solution of dimethyl ester **22** (60 mg, 0.186 mmol) in MeOH (1 cm<sup>3</sup>) was treated with aq. NaOH (20% w/v, 1 cm<sup>3</sup>) and stirred overnight at room temperature. The reaction mixture was concentrated *in vacuo*, the residue dissolved in the minimum required amount of water and acidified with conc. HCl. The precipitated product was filtered off and dried under high vacuum to afford **41** (40 mg, 73%) as an orange solid (Found: C, 52.97; H, 2.66; N, 9.43. C<sub>13</sub>H<sub>8</sub>F<sub>2</sub>N<sub>2</sub>O<sub>4</sub> requires C, 53.07; H, 2.74; N, 9.52%); mp >130 °C (decomp.);  $\nu_{\max}$  (KBr disk)/cm<sup>-1</sup> 3651, 2926, 1725, 1657, 1524, 1262, 1148 and 1098;  $\delta_{\text{H}}$  (500 MHz; DMSO-*d*<sub>6</sub>) 6.96 (1 H, td, *J* 8.5, 1.5 Hz, ArH), 7.10 (1 H, td, *J* 9.0, 6.0 Hz, ArH), 7.28 (1 H, ddd, *J* 11.5, 8.5, 2.5 Hz, ArH), 7.75 (1 H, d, *J* 4.5 Hz, pyH), 8.21 (1 H, d, *J* 4.5 Hz, pyH) and 9.39 (1 H, br s, NH);  $\delta_{\text{C}}$  (125 MHz; DMSO-*d*<sub>6</sub>) 104.5, 111.2, 122.8, 126.9, 127.0 and 127.6, 137.8, 139.1

and 140.1, 154.9, 158.0, 167.3 and 167.7;  $m/z$  (FI+) 294.0473 ( $M^+$ .  $C_{13}H_8N_2F_2O_4$  requires 294.0452).

### 3-(2-(Methylthio)phenylamino)pyridine-2,4-dicarboxylic acid **42**

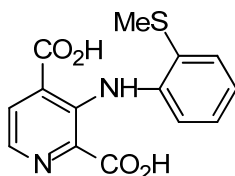

A solution of dimethyl ester **23** (229 mg, 0.688 mmol, 1 eq.) in MeOH (4 cm<sup>3</sup>) was treated with aq. NaOH (20% w/v, 1 cm<sup>3</sup>) and stirred for 1 h at room temperature. The reaction mixture was diluted with MeOH (5 cm<sup>3</sup>), filtered and concentrated to ~1 cm<sup>3</sup> final volume *in vacuo*. The remainder was acidified with conc. HCl, diluted with brine (5 cm<sup>3</sup>) and extracted with EtOAc (3 × 5 cm<sup>3</sup>). The combined organic layers were dried (Na<sub>2</sub>SO<sub>4</sub>) and concentrated *in vacuo* to afford **42** (160 mg, 76%) as a brown solid (Found: C, 55.16; H, 3.97; N, 9.15.  $C_{14}H_{12}N_2O_4S$  requires C, 55.25; H, 3.97; N, 9.21%); mp >140 °C (decomp.);  $\nu_{\max}$  (KBr disk)/cm<sup>-1</sup> 3426, 3089, 1731, 1574, 1523, 1472 and 1257;  $\delta_H$  (400 MHz; DMSO-*d*<sub>6</sub>) 2.43 (3 H, s, CH<sub>3</sub>), 6.82-6.87 (1 H, d, *J* 7.0 Hz, ArCH), 6.96-7.08 (2 H, broad, ArCH), 7.31-7.36 (1 H, d, *J* 7.0 Hz, ArCH), 7.76 (1 H, d, *J* 4.5 Hz, pyH) and 8.24 (1 H, d, *J* 4.5 Hz, pyH);  $\delta_C$  (400 MHz; DMSO-*d*<sub>6</sub>) 16.1, 116.8, 124.1, 127.2, 127.9, 129.1, 129.4, 129.8, 139.2, 140.0, 140.3, 142.0, 168.0 and 168.4.

### 3-(2-Carboxyphenylamino)pyridine-2,4-dicarboxylic acid **43**

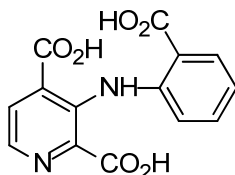

A solution of dimethyl ester **24** (101 mg, 0.293 mmol) in MeOH (4 cm<sup>3</sup>) was treated with aq. NaOH (20% w/v, 1 cm<sup>3</sup>) and stirred for 1 h at room temperature. The reaction mixture was diluted with MeOH (5 cm<sup>3</sup>), filtered and concentrated to ~1 cm<sup>3</sup> final volume *in vacuo*. The remainder was acidified with conc. HCl, diluted with brine (5 cm<sup>3</sup>) and extracted with EtOAc (3 × 5 cm<sup>3</sup>). The combined organic layers were dried (Na<sub>2</sub>SO<sub>4</sub>) and concentrated *in vacuo* to

afford **43** (80 mg, 90%) as an orange solid (Found: C, 55.55; H, 3.34; N, 9.20. C<sub>14</sub>H<sub>10</sub>N<sub>2</sub>O<sub>6</sub> requires C, 55.63; H, 3.33; N, 9.27%); mp >160 °C (decomp.);  $\nu_{\max}$  (KBr disk)/cm<sup>-1</sup> 3426, 1704, 1579, 1519, 1452 and 1249;  $\delta_{\text{H}}$  (100 MHz; DMSO-*d*<sub>6</sub>) 6.72-6.79 (1 H, broad, ArCH), 6.83-6.89 (broad, 1H, ArCH), 7.27-7.34 (1 H, broad, ArCH), 7.77-7.82 (1 H, broad, pyH), 7.83-7.89 (1 H, broad, ArCH), 8.36-8.46 (1 H, broad, pyH) and 10.45-10.55 (1 H, broad, NH);  $\delta_{\text{C}}$  (100 MHz; DMSO-*d*<sub>6</sub>) 114.8, 116.4, 120.3, 127.1, 132.4, 134.0, 134.4, 136.0, 143.5, 144.8, 146.8, 167.3, 167.7 and 169.7.

### 3-(2-Nitrophenylamino)pyridine-2,4-dicarboxylic acid **44**

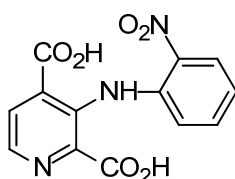

A solution of dimethyl ester **25** (132 mg, 0.398 mmol, 1 eq.) in MeOH (4 cm<sup>3</sup>) was treated with aq. NaOH (20% w/v, 1 cm<sup>3</sup>) and stirred for 1 h at room temperature. The reaction mixture was diluted with MeOH (5 cm<sup>3</sup>), filtered and concentrated to ~1 cm<sup>3</sup> final volume *in vacuo*. The remainder was acidified with conc. HCl, diluted with brine (5 cm<sup>3</sup>) and extracted with EtOAc (3 × 5 cm<sup>3</sup>). The combined organic layers were dried (Na<sub>2</sub>SO<sub>4</sub>) and concentrated *in vacuo* to afford **44** (105 mg, 87%) as a yellow solid (Found: C, 51.38; H, 3.08; N, 13.78. C<sub>13</sub>H<sub>9</sub>N<sub>3</sub>O<sub>6</sub> requires C, 51.49; H, 2.99; N, 13.86); mp >175 °C (decomp.);  $\nu_{\max}$  (KBr disk)/cm<sup>-1</sup> 3436, 2924, 1708, 1609, 1576, 1499 and 1446;  $\delta_{\text{H}}$  (400 MHz; DMSO-*d*<sub>6</sub>) 6.99 (1 H, d, *J* 8.5 Hz, ArH), 7.03 (1 H, t, *J* 7.5 Hz, ArH), 7.51 (1 H, t, *J* 7.5 Hz, ArH), 7.89 (1 H, d, *J* 4.5 Hz, pyH), 8.11 (1 H, d, *J* 8.5 Hz, ArH), 8.50 (1 H, d, *J* 4.5 Hz, pyH), 10.55 (1 H, br s, NH) and 13.71 (2 H, br s, CO<sub>2</sub>H);  $\delta_{\text{C}}$  (126 MHz; DMSO-*d*<sub>6</sub>) 117.4, 120.6, 126.0, 126.7, 132.8, 135.1, 135.5, 136.7, 140.2, 143.3, 143.7, 166.4 and 166.9.

### 3-(2-Methoxyphenylamino)pyridine-2,4-dicarboxylic acid **45**

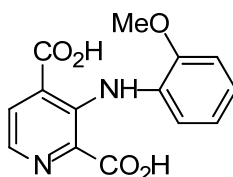

A solution of dimethyl ester **26** (169 mg, 0.534 mmol) in MeOH (4 cm<sup>3</sup>) was treated with aq. NaOH (20% w/v, 1 cm<sup>3</sup>) and stirred for 1 h at room temperature. The reaction mixture was diluted with MeOH (5 cm<sup>3</sup>), filtered and concentrated to ~1 cm<sup>3</sup> final volume *in vacuo*. The remainder was acidified with conc. HCl, diluted with brine (5 cm<sup>3</sup>) and extracted with EtOAc (3 × 5 cm<sup>3</sup>). The combined organic layers were dried (Na<sub>2</sub>SO<sub>4</sub>) and concentrated *in vacuo* to afford **45** (100 mg, 65%) as an orange solid (Found: C, 58.45; H, 4.27; N, 9.65. C<sub>14</sub>H<sub>12</sub>N<sub>2</sub>O<sub>5</sub> requires C, 58.33; H, 4.20; N 9.72%); mp >155 °C (decomp.);  $\nu_{\max}$  (KBr disk)/cm<sup>-1</sup> 3424, 2995, 1708, 1670, 1599, 1531, 1494 and 1459;  $\delta_{\text{H}}$  (500 MHz; DMSO-*d*<sub>6</sub>) 3.81 (3 H, s, OCH<sub>3</sub>), 6.79 (1 H, t, *J* 7.5 Hz, ArH), 6.87 (1 H, d, *J* 6.5 Hz, ArH), 6.95 (1 H, t, *J* 7.5 Hz, ArH), 6.98-7.03 (1 H, m, ArH), 7.76 (1 H, d, *J* 4.5 Hz, pyH), 8.19 (1 H, d, *J* 4.5 Hz, pyH) and 9.46 (1 H, br s, NH);  $\delta_{\text{C}}$  (126 MHz; DMSO-*d*<sub>6</sub>) 55.6, 111.6, 115.9, 120.2, 122.9, 126.9, 128.4, 131.1, 137.8, 138.5, 139.2, 149.9, 167.0 and 167.4.

### 3-(*o*-Tolylamino)pyridine-2,4-dicarboxylic acid **46**

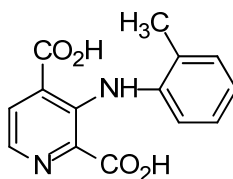

A solution of dimethyl ester **27** (106 mg, 0.353 mmol) in MeOH (4 cm<sup>3</sup>) was treated with aq. NaOH (20% w/v, 1 cm<sup>3</sup>) and stirred for 1 h at room temperature. The reaction mixture was diluted with MeOH (5 cm<sup>3</sup>), filtered and concentrated to ~1 cm<sup>3</sup> final volume *in vacuo*. The remainder was acidified with conc. HCl, diluted with brine (5 cm<sup>3</sup>) and extracted with EtOAc (3 × 5 cm<sup>3</sup>). The combined organic layers were dried (Na<sub>2</sub>SO<sub>4</sub>) and concentrated *in vacuo* to afford **46** (70 mg, 73%) as an orange solid (Found: C, 61.62; H, 4.37; N, 10.38. C<sub>14</sub>H<sub>12</sub>N<sub>2</sub>O<sub>4</sub> requires C, 61.76; H, 4.44; N, 10.29%); mp >135 °C (decomp.);  $\nu_{\max}$  (KBr disk)/cm<sup>-1</sup> 3426, 2924, 1725, 1647, 1584, 1523, 1461 and 1254;  $\delta_{\text{H}}$  (500 MHz; DMSO-*d*<sub>6</sub>) 2.26 (3 H, s, CH<sub>3</sub>),

6.85 (1 H, d,  $J$  8.0 Hz, ArH), 6.95 (1 H, t,  $J$  7.0 Hz, ArH), 7.04 (1 H, t,  $J$  7.5 Hz, ArH), 7.21 (1 H, d,  $J$  7.5 Hz, ArH), 7.74 (1 H, d,  $J$  4.5 Hz, pyH), 8.18 (1 H, d,  $J$  4.5 Hz, pyH), 9.37 (1 H, br s, NH) and 13.36 (br s, CO<sub>2</sub>H);  $\delta_C$  (126 MHz; DMSO-*d*<sub>6</sub>) 17.7, 117.8, 123.4, 126.3, 127.0, 127.7, 129.6, 130.6, 137.5, 138.4, 140.7, 141.0, 167.3 and 167.7.

### 3-(2-Fluorophenylamino)pyridine-2,4-dicarboxylic acid **47**

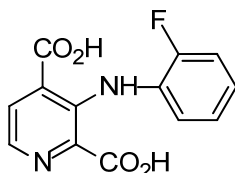

A solution of dimethyl ester **28** (149 mg, 0.49 mmol, 1 eq.) in MeOH (4 cm<sup>3</sup>) was treated with aq. NaOH (20% w/v, 1 cm<sup>3</sup>) and stirred for 1 h at room temperature. The reaction mixture was diluted with MeOH (5 cm<sup>3</sup>), filtered and concentrated to ~1 cm<sup>3</sup> final volume *in vacuo*. The remainder was acidified with conc. HCl, diluted with brine (5 cm<sup>3</sup>) and extracted with EtOAc (3 × 5 cm<sup>3</sup>). The combined organic layers were dried (Na<sub>2</sub>SO<sub>4</sub>) and concentrated *in vacuo* to afford **47** (72 mg, 53%) as an orange solid (Found: C, 56.43; H, 3.22; N, 10.07. C<sub>13</sub>H<sub>9</sub>FN<sub>2</sub>O<sub>4</sub> requires C, 56.53; H, 3.28; N, 10.14%); mp >160 °C (decomp.);  $\nu_{\max}$  (KBr disk)/cm<sup>-1</sup> 3430, 2927, 1719, 1532, 1465, 1292, 1249, 1153 and 1105;  $\delta_H$  (400 MHz; DMSO-*d*<sub>6</sub>) 6.94-7.29 (4 H, m, ArH), 7.79 (1 H, d,  $J$  5.0 Hz, pyH), 8.26 (1 H, d,  $J$  5.0 Hz, pyH), 9.45 (1 H, br s, NH) and 13.58 (br s, CO<sub>2</sub>H);  $\delta_C$  (125 MHz; DMSO-*d*<sub>6</sub>) 15.8, 119.3, 123.4, 124.4, 127.0, 128.5, 128.6, 138.8, 139.7, 153.1, 155.0, 167.1 and 167.6;  $\delta_F$  (377 MHz; DMSO-*d*<sub>6</sub>) -127.75.

### 3-(Naphthalen-1-ylamino)pyridine-2,4-dicarboxylic acid **48**

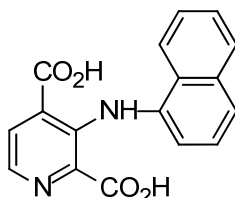

A solution of dimethyl ester **29** (114 mg, 0.339 mmol, 1 eq.) in MeOH (1 cm<sup>3</sup>) was treated with a solution of NaOH (120 mg, 3.0 mmol, 8.9 eq.) in water (1 cm<sup>3</sup>) and stirred overnight at room temperature. The reaction mixture was concentrated *in vacuo* and acidified with

conc. HCl. The precipitate was collected by filtration, washed with cold water and ether and dried under high vacuum to afford **48** (60 mg, 57%) as an orange solid (Found: C, 66.29; H, 4.02; N, 9.04. C<sub>17</sub>H<sub>12</sub>N<sub>2</sub>O<sub>4</sub> requires C, 66.23; H, 3.92; N, 9.09%); mp >180 °C (decomp.);  $\nu_{\max}$  (KBr disk)/cm<sup>-1</sup> 3436, 3094, 2988, 1727, 1646, 1581, 1522, 1476, 1388, 1288 and 1151;  $\delta_{\text{H}}$  (500 MHz; DMSO-*d*<sub>6</sub>) 7.02 (1 H, d, *J* 7.5 Hz, Ar*H*), 7.33 (1 H, t, *J* 7.5 Hz, Ar*H*), 7.54-7.66 (3 H, m, Ar*H*), 7.80 (1 H, d, *J* 4.5 Hz, py*H*), 7.89-7.97 (1 H, m, Ar*H*), 8.18 (1 H, dd, *J* 7.5, 2.0 Hz, Ar*H*), 8.27 (1 H, d, *J* 4.5 Hz, py*H*), 9.93 (1 H, br s, NH) and 13.46 (br s, CO<sub>2</sub>*H*);  $\delta_{\text{C}}$  (126 MHz; DMSO-*d*<sub>6</sub>) 113.1, 121.8, 123.2, 125.6, 126.1, 126.5, 127.0, 127.1, 128.1, 128.7, 134.1, 138.5, 139.0, 139.2, 140.6, 167.4 and 167.8.

### 3-(4-Methoxybenzylamino)pyridine-2,4-dicarboxylic acid **49**

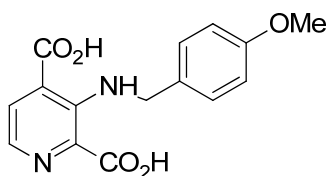

A solution of dimethyl ester **31** (130 mg, 0.39 mmol, 1 eq.) in MeOH (1 cm<sup>3</sup>) was treated with a solution of NaOH (200 mg, 5 mmol, 12.7 eq.) in water (1 cm<sup>3</sup>). Additional MeOH was added until a clear, yellow solution resulted. The reaction mixture was stirred overnight at room temperature and concentrated *in vacuo*. The residue was treated with water (5 cm<sup>3</sup>), filtered and the filtrate acidified with conc. HCl. The resulting precipitate was isolated by filtration, dissolved in MeOH/CH<sub>2</sub>Cl<sub>2</sub> and dried under high vacuum to afford **49** (114 mg, 96%) as a yellow solid; mp >110 °C (decomp.);  $\nu_{\max}$  (KBr disk)/cm<sup>-1</sup> 3431, 3189, 1712, 1659, 1614, 1531, 1515, 1461, 1252, 1153, 1104 and 1031;  $\delta_{\text{H}}$  (400 MHz; DMSO-*d*<sub>6</sub>) 3.72 (3 H, s, OCH<sub>3</sub>), 4.21 (2 H, s, NHCH<sub>2</sub>), 6.90 (2 H, d, *J* 8.0 Hz, ArCH), 7.24 (2 H, d, *J* 8.0 Hz, ArCH), 7.68 (1 H, d, *J* 4.5 Hz, py*H*), 7.94 (1 H, d, *J* 4.5 Hz, py*H*) and 8.50 (br s, NH);  $\delta_{\text{C}}$  (100 MHz; DMSO-*d*<sub>6</sub>) 49.2, 55.1, 114.1, 124.2, 127.2, 129.3, 130.3, 134.5, 135.0, 144.4, 158.8, 168.3 and 168.5; *m/z* (ESI-) 301.0834 (M - H<sup>+</sup>. C<sub>15</sub>H<sub>13</sub>N<sub>2</sub>O<sub>5</sub> requires 301.0830).

### 3-Aminopyridine-2,4-dicarboxylic acid **50**

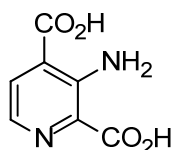

A solution of dimethyl ester **32** (50 mg, 0.24 mmol, 1 eq.) in MeOH (1 cm<sup>3</sup>) was treated with aq. NaOH (20% w/v, 1 cm<sup>3</sup>) and stirred for 2 h at room temperature. The reaction mixture was concentrated *in vacuo*, the residue dissolved in the minimum required amount of water and neutralised with conc. HCl. The solution was cooled to 4 °C, the precipitate was isolated by filtration, resuspended in MeOH/CH<sub>2</sub>Cl<sub>2</sub>, concentrated *in vacuo* and dried in high vacuum to afford **50** (29 mg, 67%) as a pale yellow solid (Found: C, 46.06; H, 3.23; N, 15.28. C<sub>7</sub>H<sub>6</sub>N<sub>2</sub>O<sub>4</sub> requires C, 46.16; H, 3.32; N, 15.38%); mp >250 °C (decomp.);  $\nu_{\max}$  (KBr disk)/cm<sup>-1</sup> 3421, 3316, 1692, 1585, 1537, 1302, 1256, 1162 and 1101;  $\delta_{\text{H}}$  (500 MHz; DMSO-*d*<sub>6</sub>) 7.85 (2 H, apparent s, pyH);  $\delta_{\text{C}}$  (126 MHz; CDCl<sub>3</sub>) 128.2, 134.1, 135.0, 138.6, 152.8, 172.9, 173.2; *m/z* (ESI-) 181.0246 (M – H<sup>+</sup>. C<sub>7</sub>H<sub>5</sub>N<sub>2</sub>O<sub>4</sub> requires 181.0255).

## Analytical HPLC analysis for tested compounds

**Supporting Table 1: % purity of tested compounds.** % purity was determined using a Dionex Ultimate 3000 analytical HPLC system, with a Phenomenex Onyx Monolithic C<sub>18</sub> analytical HPLC column (100x4.6 mm), injection volume 20  $\mu$ L and a gradient of H<sub>2</sub>O/MeCN (0.1% CF<sub>3</sub>CO<sub>2</sub>H) at a flow rate of 3 mL/min. The reported purities (in %) refer to the relative area under the curve (AUC) of the major peak as determined by integration of the UV absorbance traces at 254 nm.

| <b>Compound</b> | <b>% purity by analytical HPLC</b> |
|-----------------|------------------------------------|
| <b>24PDCA</b>   | >99%                               |
| <b>33</b>       | 97.9%                              |
| <b>34</b>       | 98.1%                              |
| <b>35</b>       | 98.4%                              |
| <b>36</b>       | 99.7%                              |
| <b>37</b>       | 98.5%                              |
| <b>38</b>       | 97.4%                              |
| <b>39</b>       | 99.9%                              |
| <b>40</b>       | 95.8%                              |
| <b>41</b>       | 98.6%                              |
| <b>42</b>       | 96.6%                              |
| <b>43</b>       | 98.3%                              |
| <b>44</b>       | 98.8%                              |
| <b>45</b>       | 98.0%                              |
| <b>46</b>       | 96.8%                              |
| <b>47</b>       | 96.6%                              |
| <b>48</b>       | 96.9%                              |
| <b>49</b>       | 96.1%                              |
| <b>50</b>       | 98.3%                              |



## HPLC chromatograms for compounds 33-50.

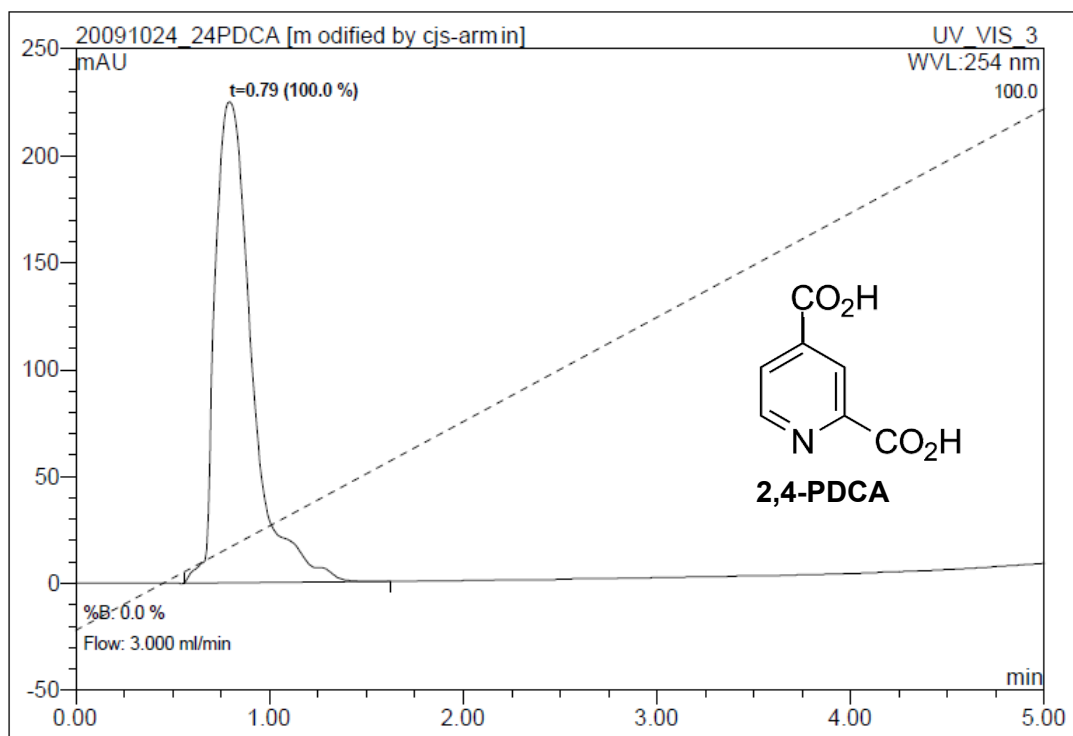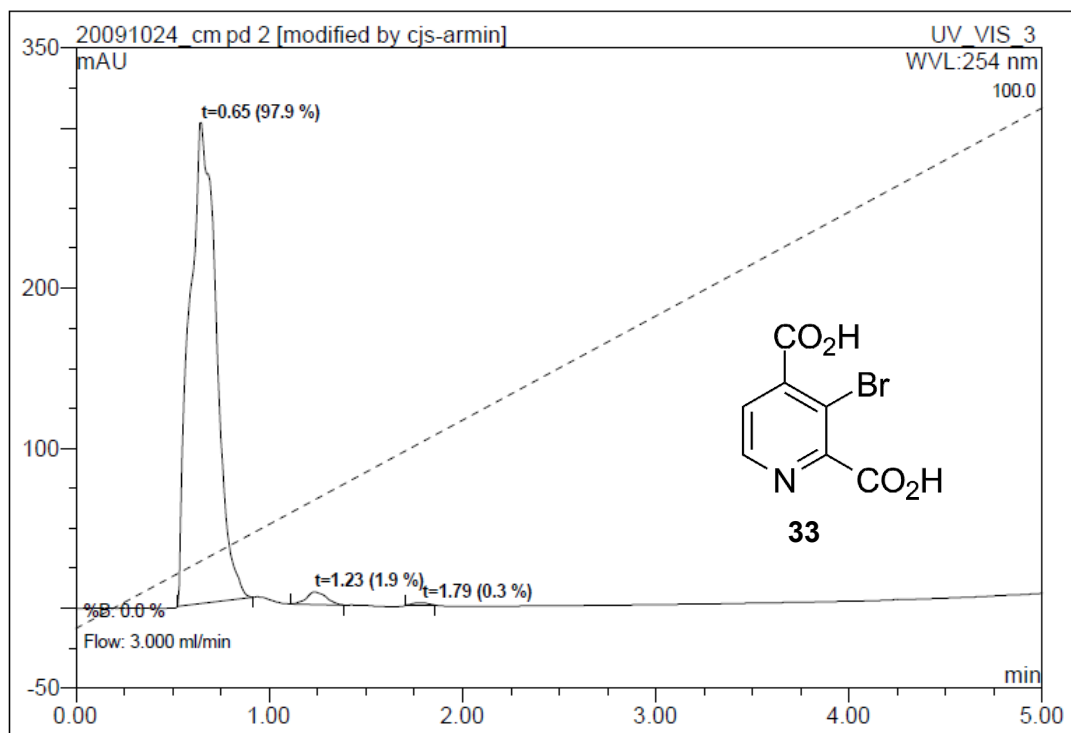

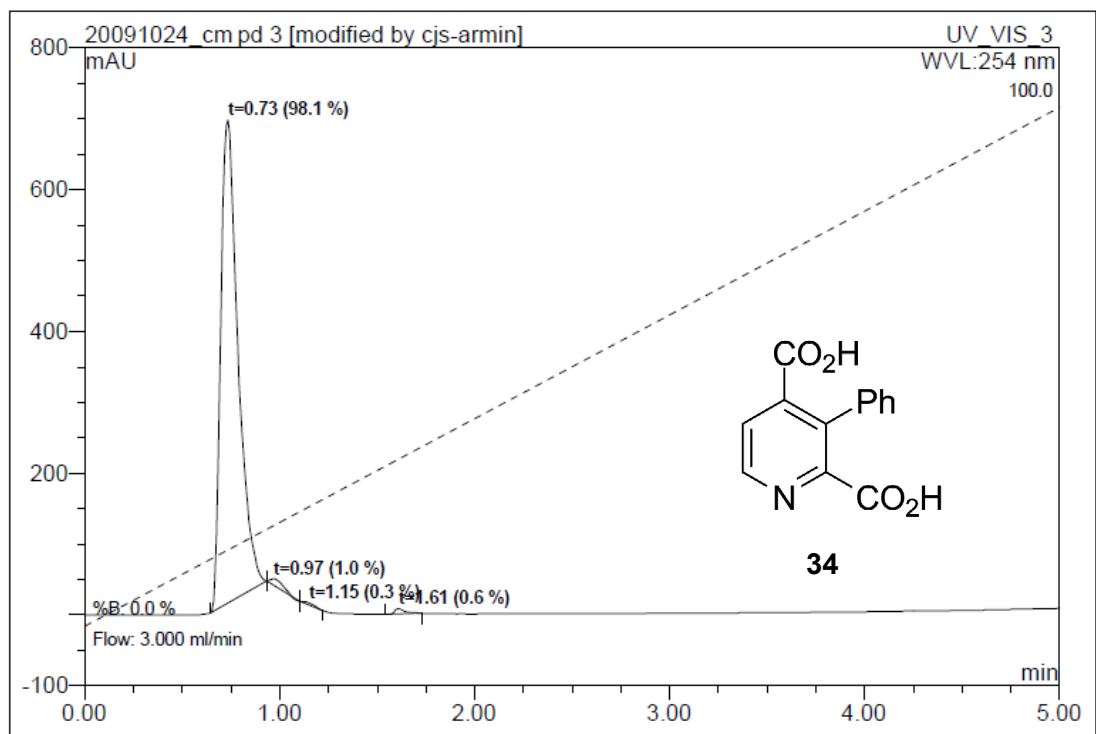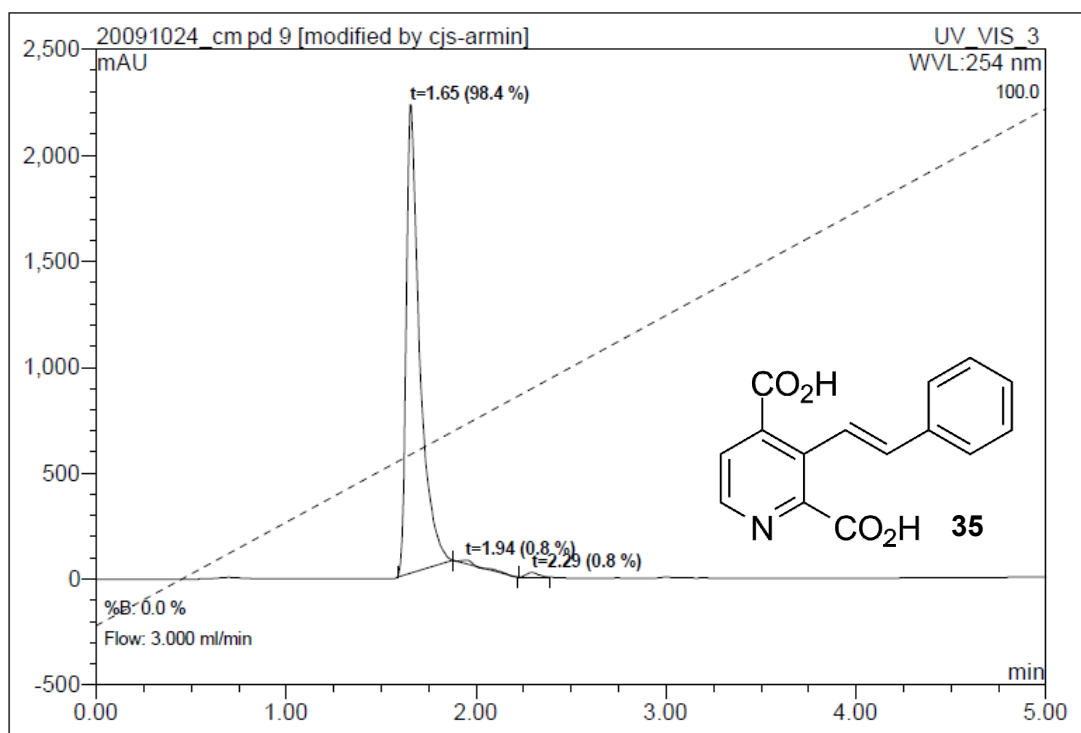

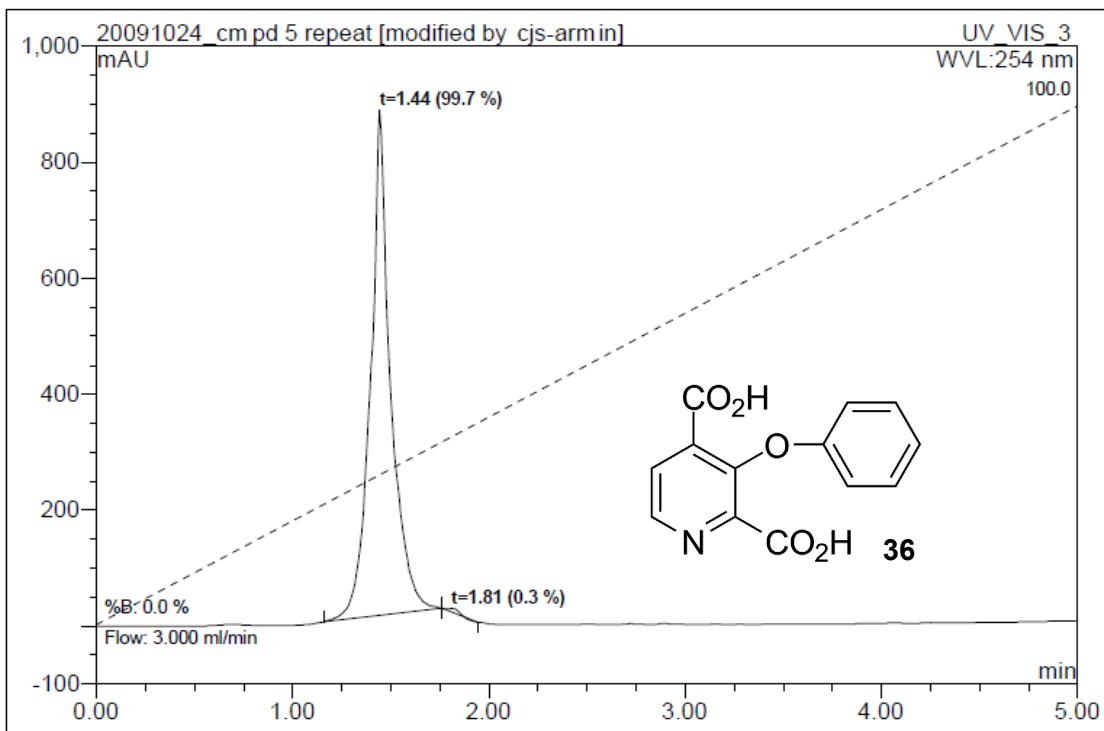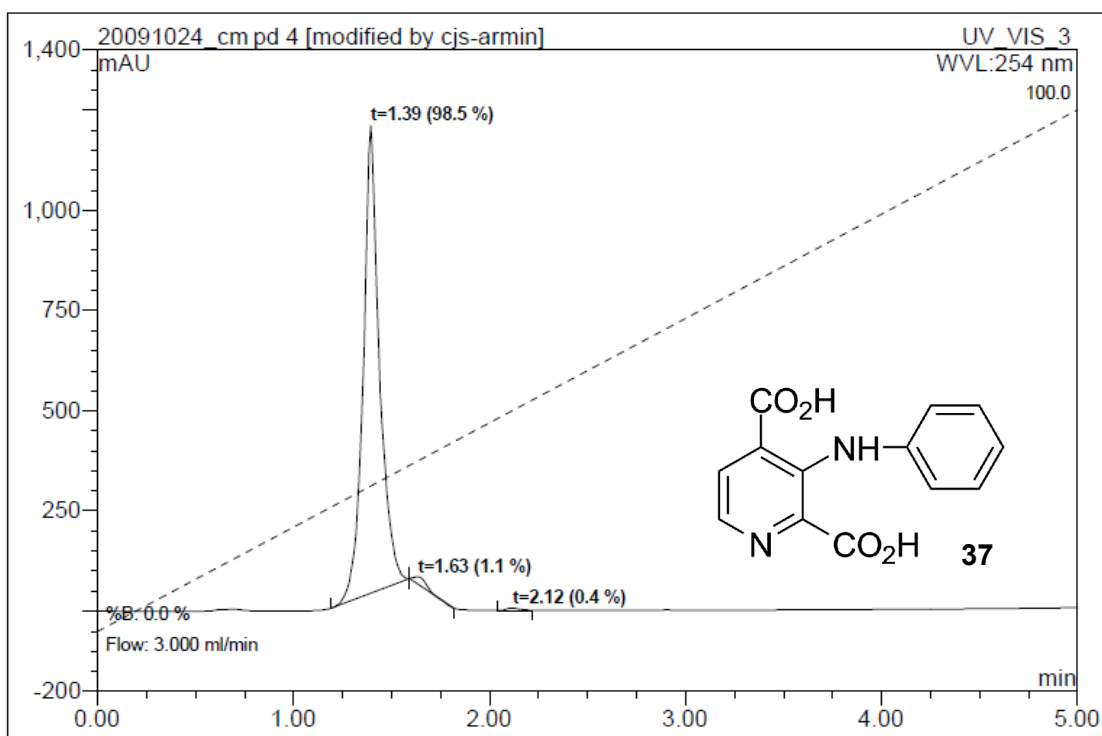

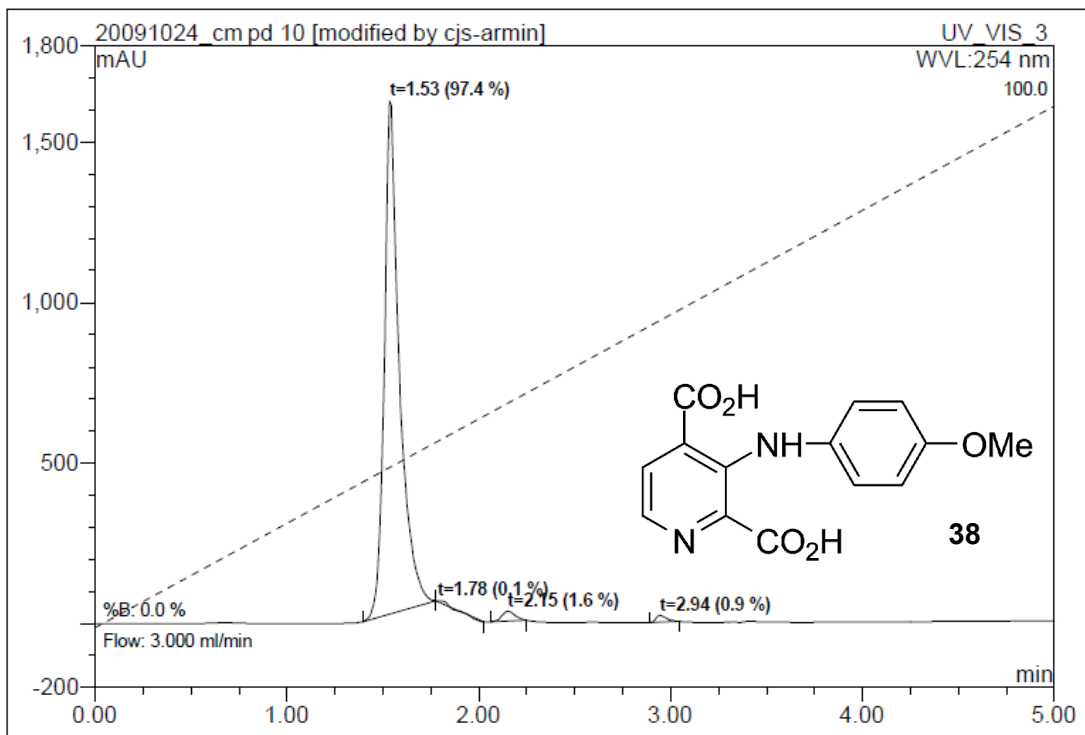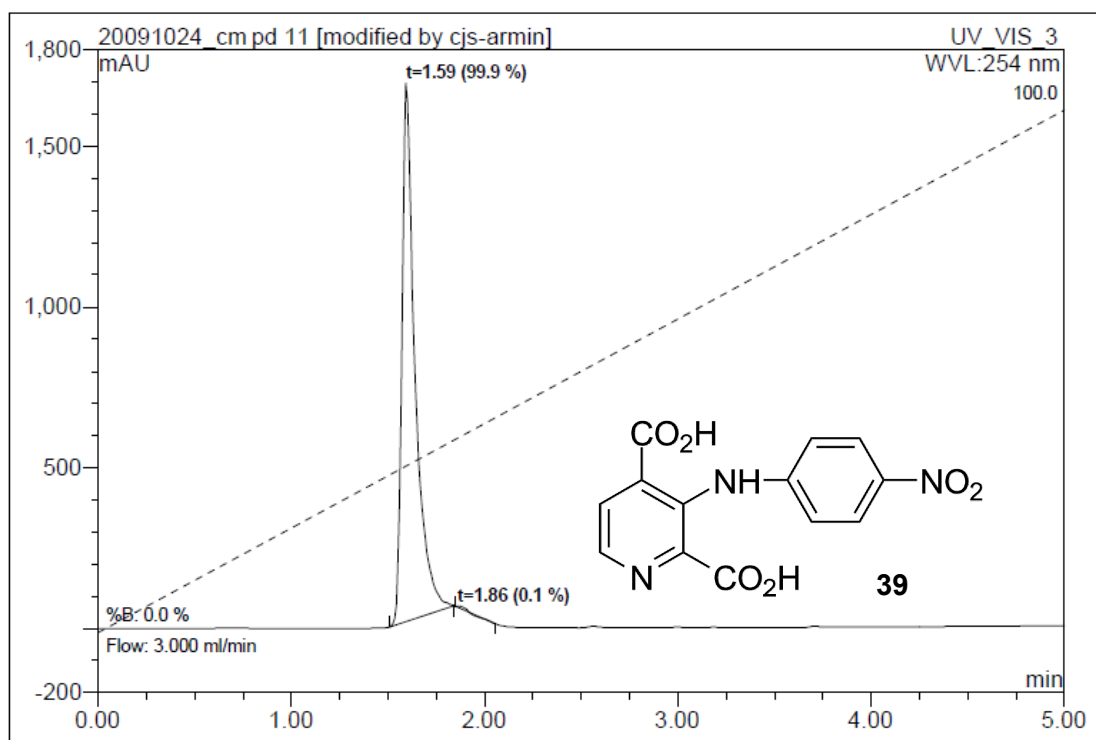

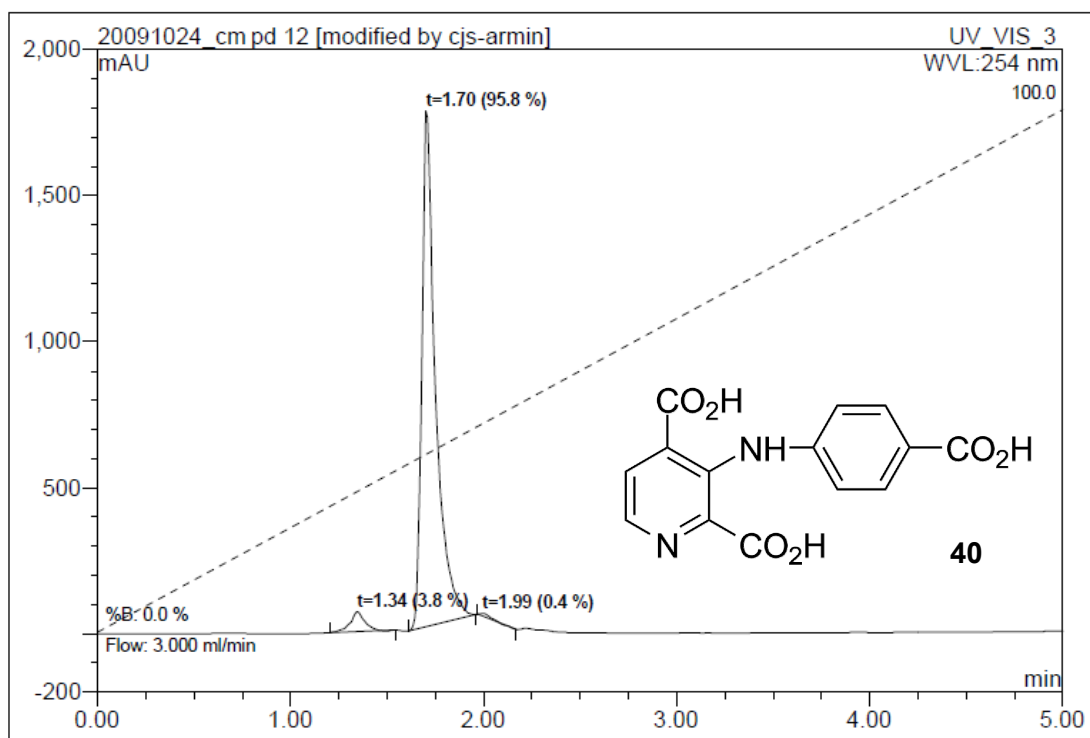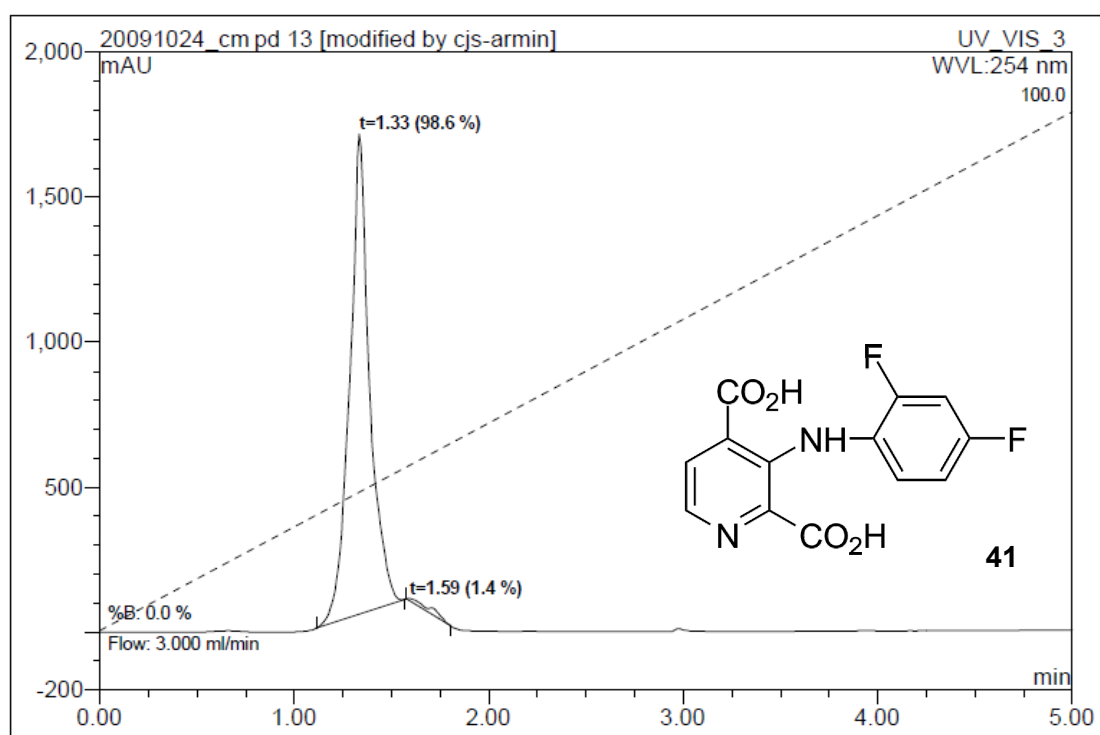

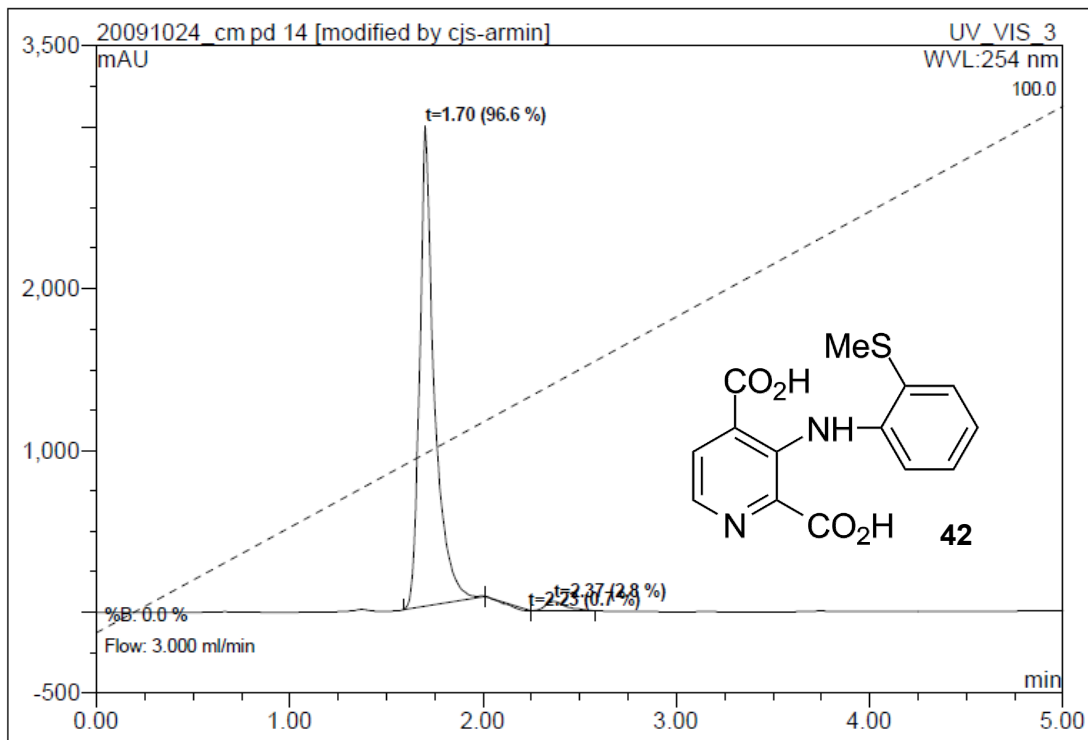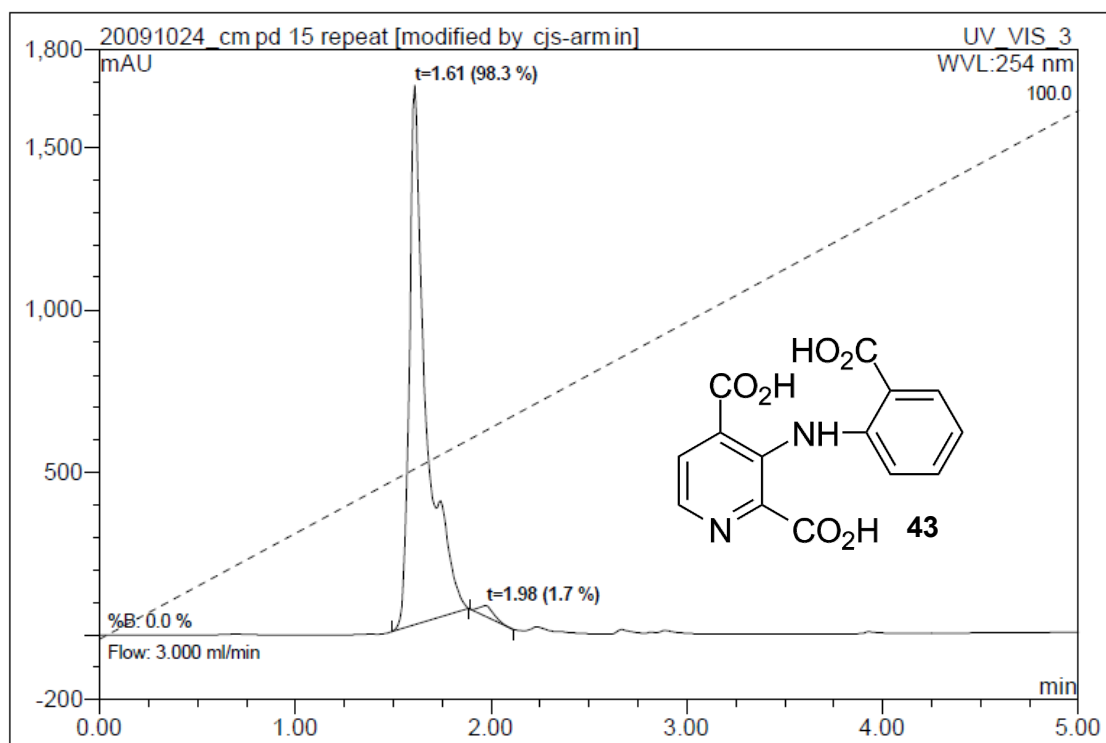

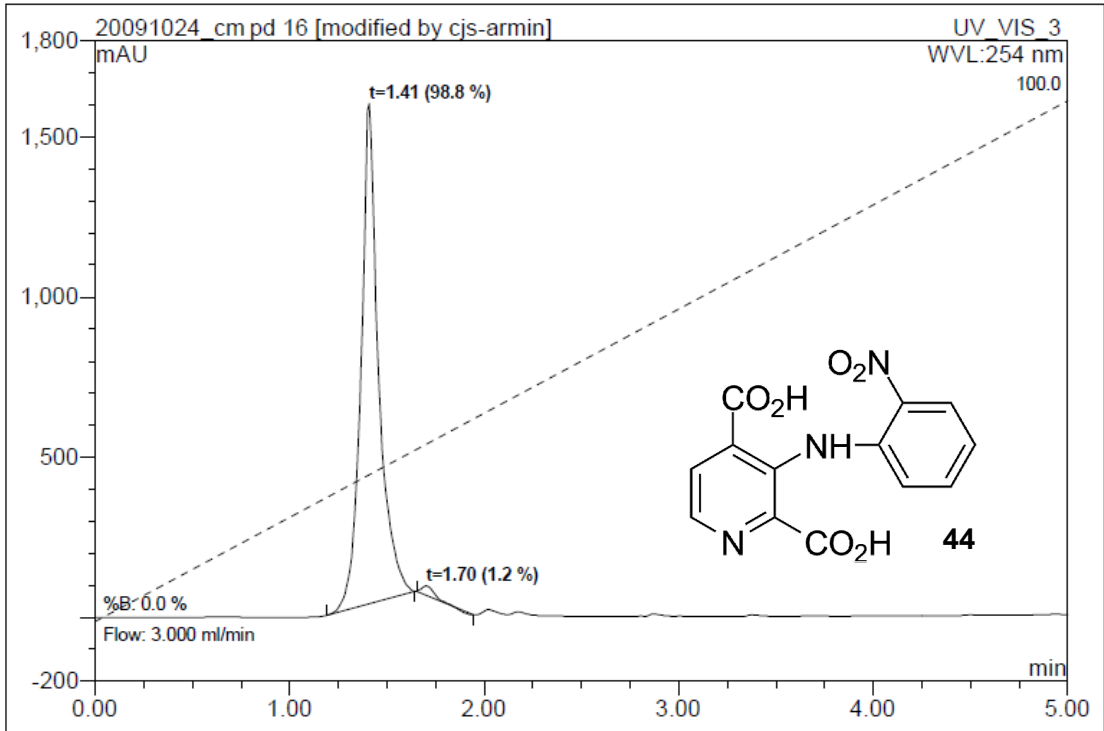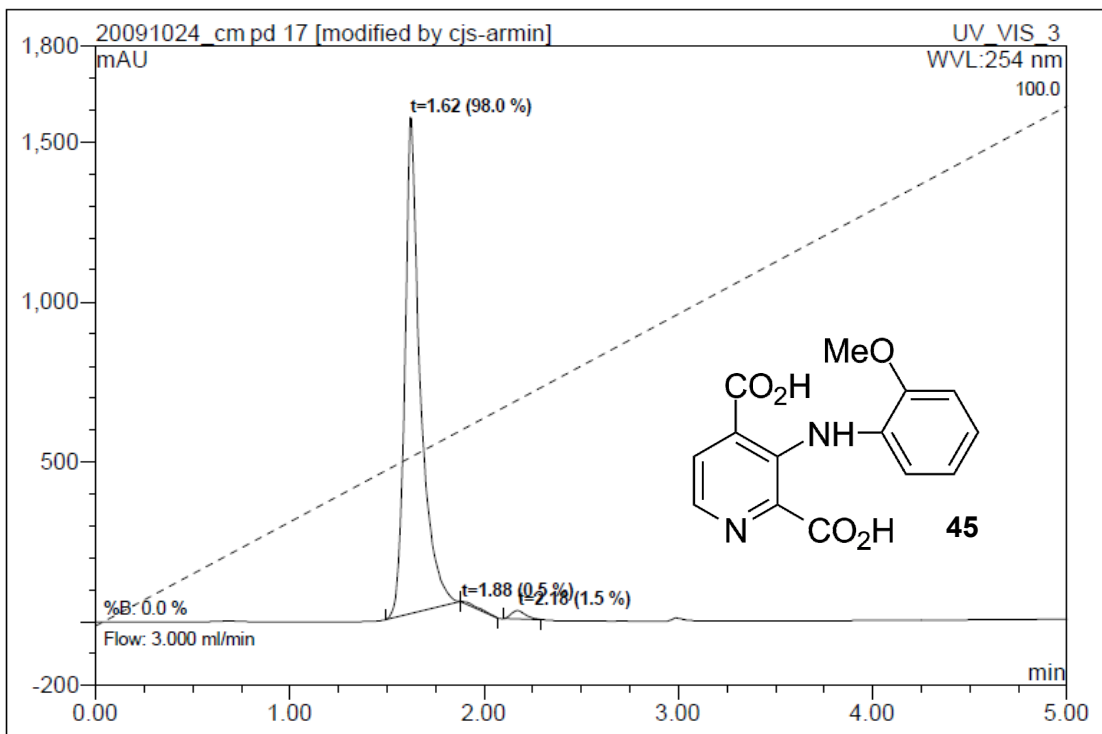

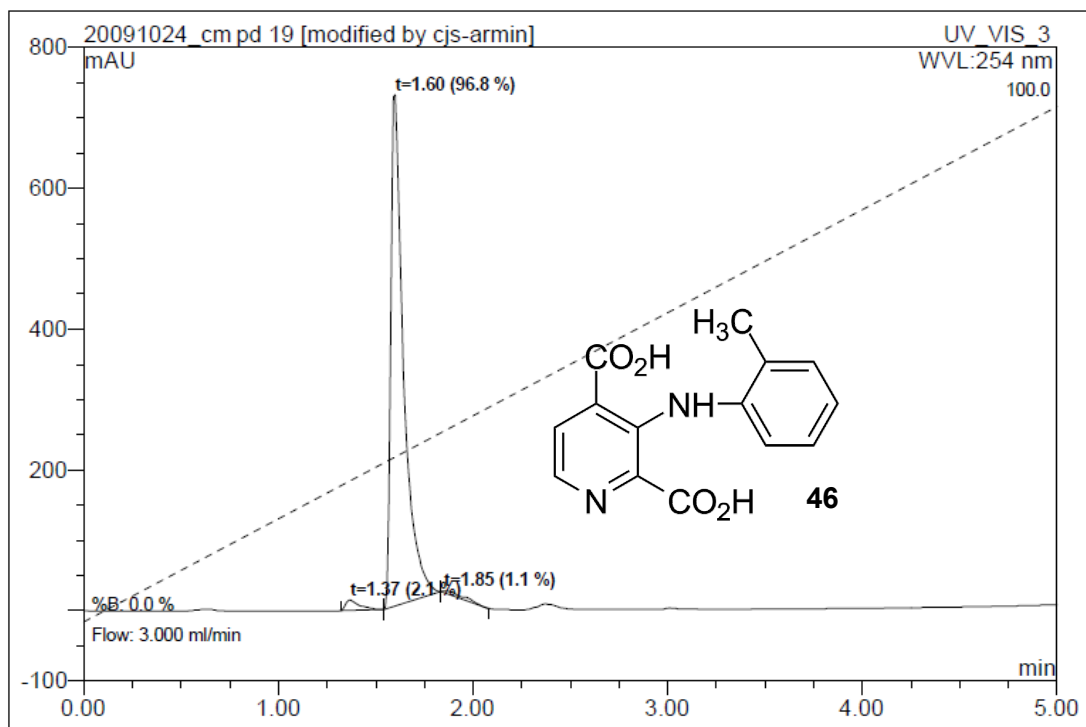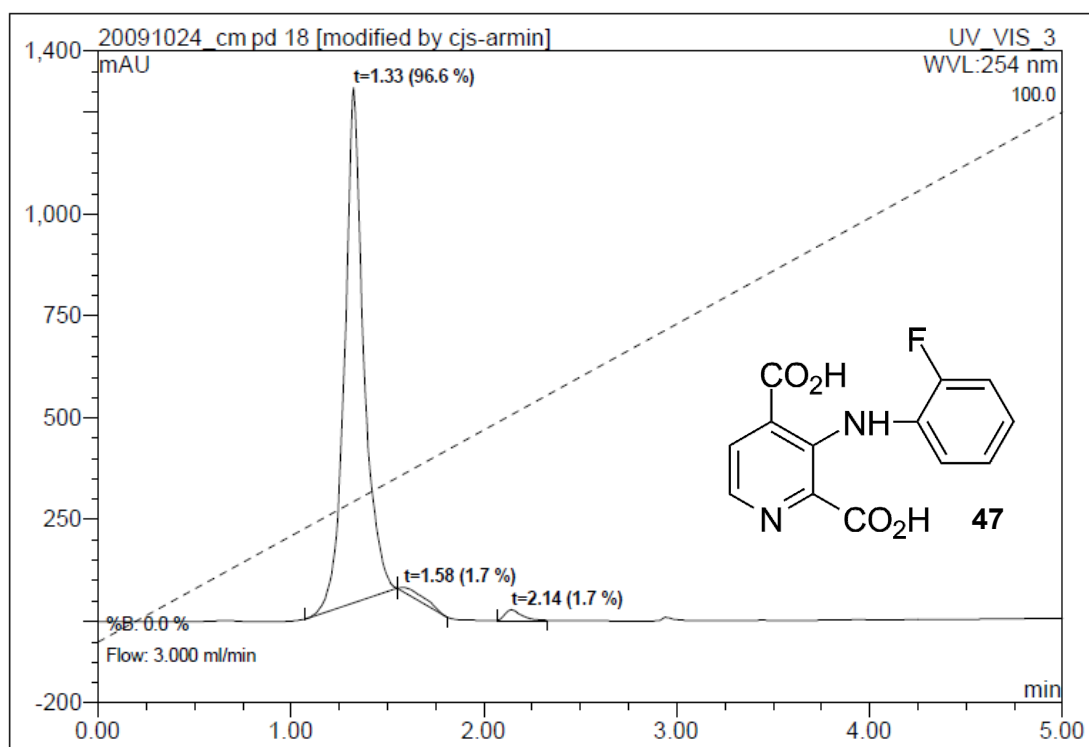



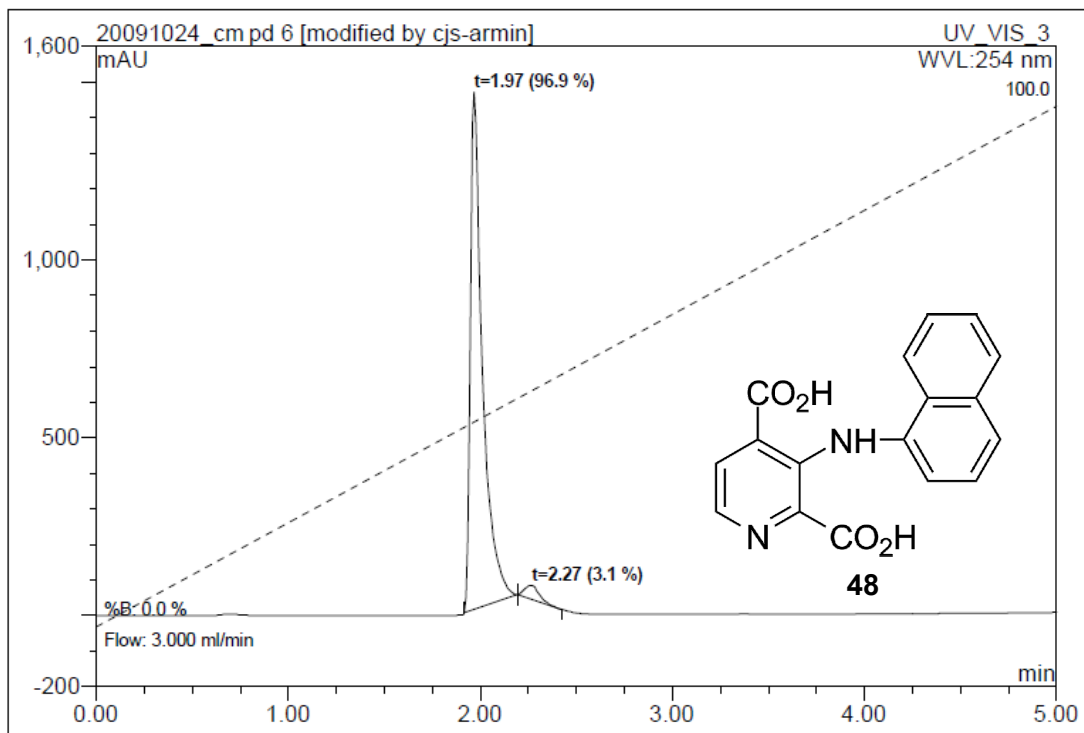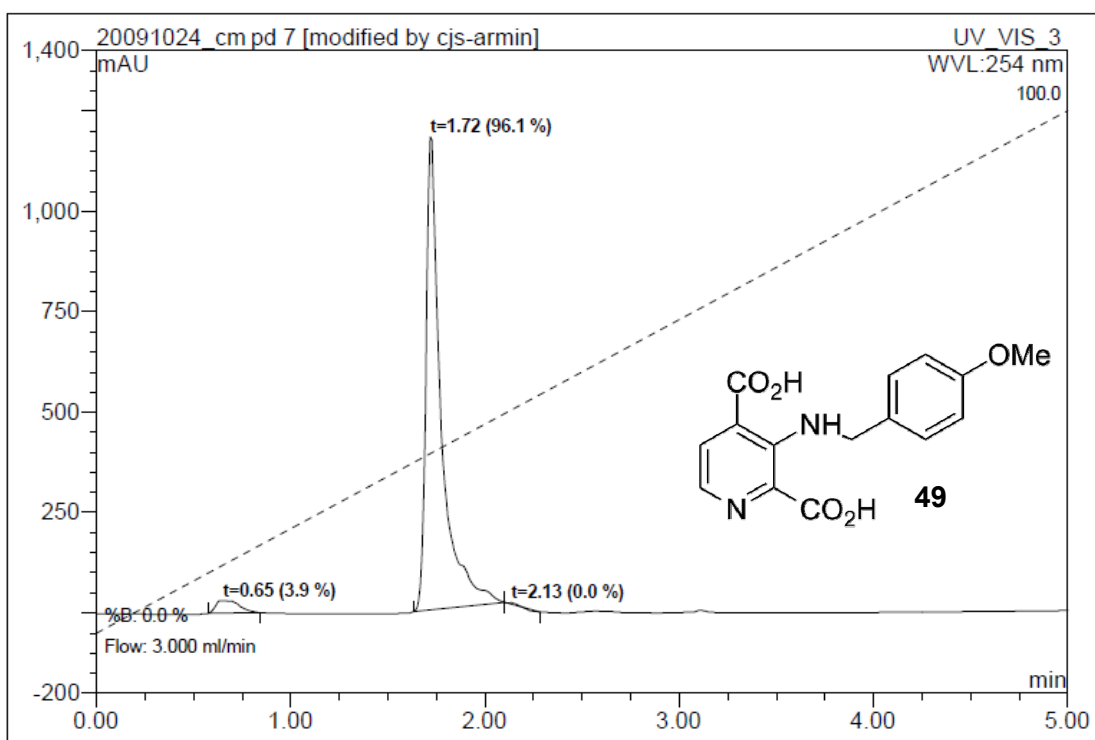

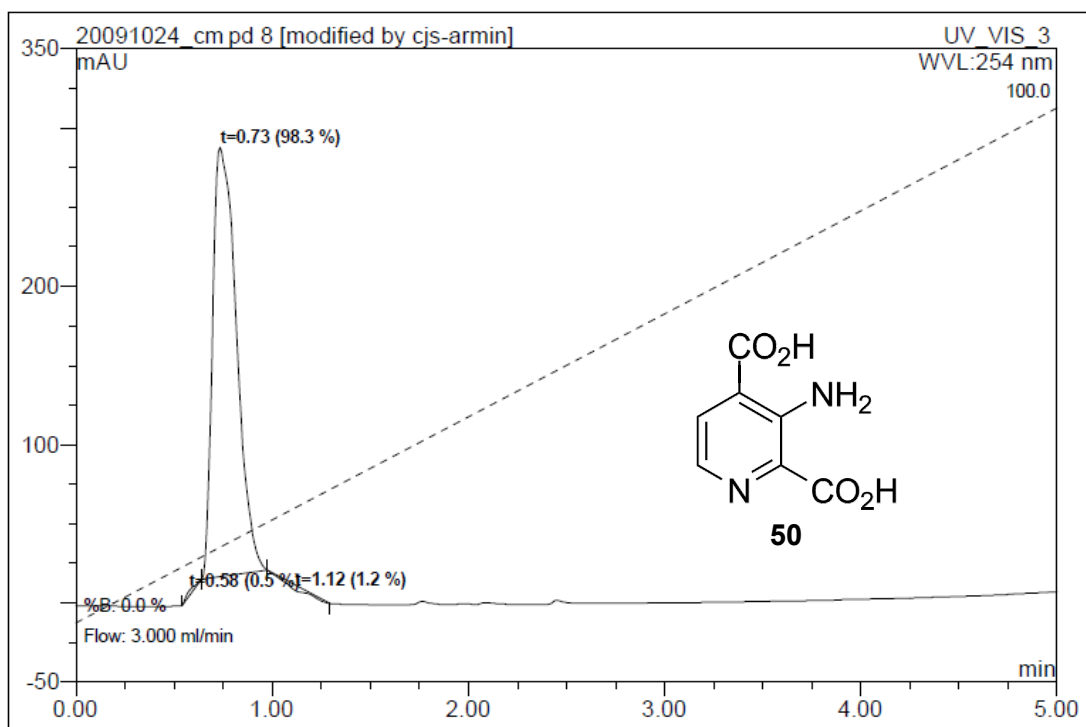

## References for Supporting Information

1. N. R. Rose, S. S. Ng, J. Mecinovic, B. M. Lienard, S. H. Bello, Z. Sun, M. A. McDonough, U. Oppermann and C. J. Schofield, *J. Med. Chem.*, 2008, 51, 7053-7056.
2. J. H. Dao, R. J. M. Kurzeja, J. M. Morachis, H. Veith, J. Lewis, V. Yu, C. M. Tegley and P. Tagari, *Anal. Biochem.*, 2009, 384, 213-223.
3. W.-C. Hon, M. I. Wilson, K. Harlos, T. D. W. Claridge, C. J. Schofield, C. W. Pugh, P. H. Maxwell, P. J. Ratcliffe, D. I. Stuart and E. Y. Jones, *Nature*, 2002, 417, 975-978.
